# 1 Thalamocortical network connectivity controls spatiotemporal dynamics of 2 cortical and thalamic traveling waves

3  
4 Sayak Bhattacharya<sup>1</sup>, Matthieu B. Le Cauchois<sup>2</sup>, Pablo A. Iglesias<sup>1,\*</sup>, Zhe S. Chen<sup>3,\*</sup>

5 1. Department of Electrical and Computer Engineering, Whiting School of Engineering, Johns Hopkins  
6 University, Baltimore, MD 21218

7 2. Department of Mechanical Engineering, Whiting School of Engineering, Johns Hopkins University, Baltimore,  
8 MD 21218

9 3. Department of Psychiatry, Department of Neuroscience & Physiology, Neuroscience Institute, New York  
10 University School of Medicine, New York, NY 10016

11  
12 \*To whom correspondence should be addressed: P.I. ([pi@jhu.edu](mailto:pi@jhu.edu)) and Z.S.C. ([zhe.chen@nyulangone.org](mailto:zhe.chen@nyulangone.org))  
13

## 14 Abstract

15 **Propagation of neural activity in spatially structured neuronal networks has been observed in**  
16 **awake, anesthetized and sleeping brains. However, it remains unclear how traveling waves are**  
17 **coordinated temporally across recurrently connected brain structures, and how network**  
18 **connectivity affects spatiotemporal neural activity. Here we develop a computational model of a**  
19 **two-dimensional thalamocortical network that enables us to investigate traveling wave**  
20 **characteristics in space-time. We show that thalamocortical and intracortical network connectivity,**  
21 **excitation/inhibition balance, thalamocortical/corticothalamic delay can independently or jointly**  
22 **change the spatiotemporal patterns (radial, planar and rotating waves) and characteristics (speed,**  
23 **direction and frequency) of cortical and thalamic traveling waves. Simulations of our model further**  
24 **predict that increased thalamic inhibition induces slower cortical wave frequency, and enhanced**  
25 **cortical excitation increases cortical wave speed and oscillation frequencies. Overall, the model**  
26 **study provides not only theoretical insight into the basis for spatiotemporal wave patterns, but also**  
27 **experimental predictions that potentially control these dynamics.**

28

29 **Author Summary**

30 **Cognition or sensorimotor control requires the coordination of neural activity across widespread**  
31 **brain circuits. Propagating waves of oscillatory neural activities have been observed at both**  
32 **macroscopic and mesoscopic levels, with various frequencies, spatial coverage, and modalities.**  
33 **However, a complete understanding how thalamocortical traveling waves are originated and**  
34 **temporally coordinated in the thalamus and cortex are still unclear. Furthermore, it remains**  
35 **unknown how the network connectivity, excitation/inhibition balance, thalamocortical or**  
36 **corticothalamic delay determine the spatiotemporal wave patterns and characteristics of cortical**  
37 **and thalamic traveling waves. Here we develop a computational model of a two-dimensional**  
38 **thalamocortical network to investigate the thalamic and neocortical traveling wave characteristics**  
39 **in space-time, which allows us to quantitatively assess the impact of thalamocortical network**  
40 **properties on the formation and maintenance of complex traveling wave patterns. Our**  
41 **computational model provides strong theoretical insight into the basis of spatiotemporal wave**  
42 **propagation, as well as experimental predictions that control these wave dynamics.**

43

44 Oscillatory neural activities in the brain are often referred to as brain waves; brain waves propagating  
45 across recording electrodes in space are called traveling waves. To date, macroscopic or mesoscopic  
46 traveling waves are interpreted as spatiotemporal neural dynamics, which have been reported with various  
47 oscillatory frequencies (e.g., theta, alpha, beta, and gamma), spatial coverage (whole brain or local  
48 circuits), and modalities (e.g., slice physiology, multielectrode array, high-density EEG or ECoG, and  
49 voltage-sensitive dye optical imaging) [1-5]. As a form of either neuronal spiking activity or field potentials,  
50 propagating waves have been found in a wide range of cortical, subcortical and thalamic structures, and  
51 modulated in a spontaneous or task-dependent manner at different brain states [6-9]. However, it remains  
52 challenging to investigate mesoscopic traveling wave patterns based on simultaneous multisite  
53 multielectrode-array recordings. It also remains unclear how these spatiotemporal patterns emerge as a  
54 result of intra- or inter-network connectivity of local circuits. Biologically-inspired computational models,

55 tightly linked to experimental data, not only provide a complementary approach to investigate these  
56 questions, but also offer new experimental predictions on the circuit mechanism of wave propagation [10].

57

58 The thalamocortical network and thalamocortical oscillations play important roles in sensory processing,  
59 memory consolidation, and multisensory and sensorimotor integration [11,12]. Rhythmic or synchronous  
60 neural activity across various frequency bands has been observed in the thalamocortical system [11].  
61 Propagating wave patterns have also been found in *in vitro* and *in vivo* recordings of thalamic and cortical  
62 areas at different brain states [4]. In contrast to continuous and smooth monosynaptic traveling waves  
63 observed in the cerebral cortex (CX), traveling waves often appear discontinuous (polysynaptic “lurching  
64 wave”) in the thalamus (TH), which involves the reciprocal interaction of thalamocortical (TC) and  
65 GABAergic reticular nuclei (RE) cells [13-15]. To generate wave propagation in computational models,  
66 traveling waves have been produced in an isolated thalamus or cortex, or in a one-dimensional (1D)  
67 thalamocortical system [13,16]. Nevertheless, the precise nature of how the whole thalamocortical  
68 structure, operated as a closed-loop system, determines traveling wave patterns is not completely  
69 understood. In addition, it remains puzzling whether the traveling patterns observed in a two-dimensional  
70 (2D) topographic network may be preserved in the 1D projection. To date, a wide range of computational  
71 modeling work has been developed for traveling waves or spatiotemporal neural activity in neuronal  
72 networks [15,17,18], in neural fields [19], and in networks of coupled oscillators [20]. The modeling scale of  
73 network size varied between hundreds and tens of thousands of neurons [21]. However, to our best  
74 knowledge, no detailed computational model has been yet developed to investigate 2D cortical and  
75 thalamic traveling wave patterns and characteristics in a closed-loop thalamocortical system.

76

77 Here we develop a biologically-inspired computational model of the 2D topographic thalamocortical  
78 network that produces dynamic spatiotemporal patterns from closed-loop interaction of a total of 10,800  
79 cortical and thalamic cell populations. While our proposed 2D network is a reduced version of realistic  
80 thalamocortical circuits simplifying several biological details (e.g., Hodgkin-Huxley-type spiking neurons,  
81 and laminar cortical structures), it focuses on other important factors, such as the intracortical connectivity,

82 lateral thalamic inhibition, excitation/inhibition (E/I) imbalance, thalamocortical (or corticothalamic) delay,  
83 and their impact on the spatiotemporal traveling waves. Our model prediction suggests that rich  
84 spatiotemporal patterns and dynamics can emerge independently or jointly from the interactions of these  
85 contributing factors. Despite omitting certain biological details, this model demonstrates that  
86 spatiotemporal patterns can be interchangeably controlled through alterations in network parameters —  
87 without using neural-field approximations that assume a continuous field of neurons. Furthermore, our  
88 computational results provide new insight on diseased brain dynamics with regards to abnormality in  
89 spatiotemporal patterns.

90

91

## 92 **RESULTS**

93

### 94 **A closed-loop thalamocortical model architecture sustains propagating waves and oscillations**

95

96 We developed a 2D three-layer thalamocortical network that consists of the cortical and thalamic neurons  
97 arranged in a 2D array. For modeling simplicity, we assumed that the cortex collapsed multiple laminar  
98 structures into a single-layer structure, with mixture of excitatory (exc) and inhibitory (inh) neurons. The  
99 excitatory and inhibitory neurons are connected by excitatory or inhibitory synapses, with certain  
100 intracortical connectivity or topography (**Methods**). The thalamus consists of two layers of neurons:  
101 excitatory TC neurons and inhibitory RE neurons. Between the thalamus and cortex, there is a bottom-up  
102 (feedforward) and a top-down (feedback) connection, forming a closed-loop system (**Fig. 1a**). There are  
103 reciprocal connections between TC and RE. The inhibitory RE→TC projection inhibits the TC neurons; the  
104 excitatory TC→RE projection excites RE neurons via axon collaterals, which further inhibits the  
105 neighboring TC cells via lateral inhibition. We further ignored RE-RE connections (through dendrodendrite  
106 GABErgic synapses), which may disinhibit TC neurons through feedback disinhibition. In the subsequent  
107 section, we will explicitly discuss the effect of lateral thalamic inhibition.

108

109 For computational efficiency, we employed an approximation of the FitzHugh-Nagumo (FHN) model  
110 and adapted the Izhikevich's neuron type (Type-1/2/3; see **Methods** and **Fig. S1; Supplementary Table**  
111 **1**) to simulate the CX/TC/RE neuronal activity at each layer. The TC and RE neurons are of Type-3, and  
112 the CX neurons are of Type-1/2. Their model parameters can capture a wide range of input-dependent  
113 firing as well as bursting and tonic spiking activity [22].

114

115 For the purpose of model validation, we first examined traveling waves in an open-loop condition (i.e.,  
116 without CX-RE connection, 99% intraconnected CX, 99% excitatory neurons). Our 2D thalamocortical  
117 model produced traveling waves in both cortex and thalamus (**Fig. 1b**). In a 2D graphical illustration, the  
118 dynamic evolution of traveling wave was visible in time (from left to right panels, with arrows indicating the  
119 wave direction). The mutual recruitment of excitatory spikes and inhibitory rebound spikes created the  
120 lurching wave phenotype in the thalamus, resulting in periodic gaps of temporal activity (**Fig. 1c**), as  
121 opposed to the smooth cortical wave, validating the basic structure of our model [4]. The traveling wave  
122 initiated at a specific location in the 2D neuronal space, and then spread its pattern across other areas  
123 (see 1D projection in **Fig. 1c**). Next, we examined traveling waves in a closed-loop condition (with RE-CX  
124 connection), under a similar connectivity setup. This produced sustained oscillations in both the thalamus  
125 and cortex (**Supplementary Video S1**). Note that periodic oscillations were sustained because of the  
126 closed-loop feedback and feedforward connections. Without either connection, the thalamic oscillations  
127 wouldn't continue (**Fig. S1d**). Here, the thalamic wave exhibited a diamond-like shape due to the short-  
128 range nature of the reciprocal connections. Next, we updated the model conditions to 80% excitatory and  
129 20% inhibitory neurons in the cortex, so as to have the 4:1 ratio of exc-to-inh neurons, and 99%  
130 intracortical connectivity. In this case, our model produced oscillations with spontaneous random wave  
131 directions (**Fig. 1d** and **Video S2**). In **Figure 1e**, the 1D projections illustrate the effect of inhibitory  
132 neurons that disrupted the cortical waves through creating inaccessible regions. On average, the cortical  
133 wave speed was faster than the thalamic wave speed (**Fig. 1f**). As the number of excitatory neurons was  
134 decreased, the cortical and thalamic wave speeds converged because of the cortical-thalamic  
135 synchronization across inhibitory zones (**Fig. S2**). We set the feedback connectivity between the cortex

136 and thalamus at 10%; higher RE-CX connectivity would cause the cortical wave to dominate the thalamic  
137 wave, or cause the thalamic lurching (staggered activity in time) to vanish quickly (**Video S3** and **Fig. S2**).  
138 Together, these results suggest that by closing the loop, the thalamocortical model may produce rich  
139 oscillations with random traveling wave patterns, as well as distinct traveling wave speed between the  
140 cortex and thalamus.

141

### 142 **Low intracortical connectivity necessitates clustered cortical neurons to yield traveling waves**

143

144 In order to sustain wave propagation, or equivalently, to maintain sufficient wave propagation area in time,  
145 we found that a high percentage of intracortical connectivity was necessary. In the neocortex, we assumed  
146 that the overall intracortical connectivity was 25-36%, with 4:1 ratio of exc-to-inh neurons. In our cortex-  
147 alone structure (i.e., without the thalamus) with 25% intracortical connectivity, we found that it was difficult  
148 to sustain spontaneous cortical wave propagation. The cortical wave area increased proportionally with the  
149 intracortical connectivity (**Fig. 2a**). When the intracortical connectivity was below 25%, the cortical wave  
150 structure lost continuity and reduced to isolated dot patterns. When the thalamus was included in the  
151 closed loop, a punctate wave band was observed in the cortex, completely in synchronization with the  
152 thalamus (**Fig. S2**), thereby not enabling spontaneous cortical wave propagation.

153

154 In cortical circuits, excitatory connections are not uniformly distributed, and exhibit clustering into  
155 groups of highly connected neurons [23]. Therefore, for a fixed intracortical connectivity, it implies that the  
156 connectivity is high within the clustered groups, and low outside the clustered groups. To investigate the  
157 impact of connectivity topography, we modified the 2D arrangement of neurons from uniform connectivity  
158 (**Fig. 2b**, left and middle panels) to clustered structure (**Fig. 2b**, right panel, with the same overall  
159 connectivity as the middle panel). Within the clustered group, the intracortical connectivity was ~90%, while  
160 maintaining the overall 25% connectivity. Our model simulations showed that the propagating waves were  
161 prominent within the cluster, as opposed to the puncta patterns outside the cluster (**Fig. 2c,d**).

162

163 Furthermore, we compared the impact of open vs. closed-loop on the cortical traveling waves. In the  
164 open-loop condition, we assumed that there was 99% intracortical connectivity within two clustered cortical  
165 neuronal groups (with overall 31% connectivity). The cortical wave was initially triggered within cluster 1,  
166 but failed to propagate to cluster 2 (**Fig. 2e**). In the closed-loop setting, under the same connectivity  
167 condition, we observed propagating waves in both thalamus and two cortical clusters (**Fig. 2f** and **Video**  
168 **S4**). This result suggests the potential role of the thalamus in communicating cortical travel waves across  
169 multiple isolated areas.

170

171

### 172 **Lateral thalamic inhibition and thalamocortical delay reshape spatiotemporal cortical dynamics**

173

174 Next, we considered the RE-RE connections and investigated the effect of lateral thalamic inhibition (within  
175 the RE layer). We focused on a reduced thalamocortical model, the RE-CX structure (**Table S2**), where  
176 RE cells were fully connected with strong intra-RE excitation, which exerted lateral thalamic inhibition (**Fig.**  
177 **3a**). To highlight the effect, we first assumed that CX was fully connected with excitatory neurons only,  
178 analogous to the zoom-in view of a clustered group. The RE-CX connectivity was assumed 100% to begin  
179 with, and a delay parameter was introduced between RE and CX (i.e., no instant feedback). The time  
180 delay during synaptic transmission within a closed-loop system is known to play an important role in its  
181 intrinsic dynamics [18,24].

182

183 We systematically varied the thalamocortical delay parameter (0, 2, 4 ms) and observed the  
184 spatiotemporal wave patterns in RE and CX (**Fig. 3b**). When there was no delay and RE-CX were fully  
185 connected, the cortical wave was instantly disrupted by RE inhibition. Increasing the delay to 2 ms allowed  
186 the cortical wave to propagate to a certain distance before a complete disruption by RE inhibition.  
187 Increasing the delay to 4 ms enabled the cortical wave to propagate further.

188

189 In the reduced model, we next lowered the RE-CX connectivity percentage from 100% to 90%, where  
190 the unconnected neurons were chosen randomly (**Fig. 3c**, leftmost panel). In the case of an intermediate  
191 delay, we observed a rich repertoire of cortical traveling wave patterns, such as radial, planar, and rotating  
192 waves (**Fig. 3c,d** and **Videos S5 and S6**), and the traveling wave direction or pattern could change in time  
193 ( $t=14$  vs.  $t=18$  ms in **Fig. 3c**;  $t=52$  vs.  $t=84$  vs.  $t=124$  ms in **Fig. 3d**). The duration of the cortical wave  
194 pattern depended on the delay parameter (**Fig. 3e**). A small delay led to a quick disruption of cortical wave  
195 by lateral thalamic inhibition, whereas a large thalamocortical delay caused the cortical wave to escape the  
196 field of view before thalamic inhibition became effective. Our results suggest that an optimal delay regime  
197 may exist to maintain the cortical traveling wave structure for a thalamocortical network with specific  
198 connectivity.

199

200

### 201 **RE-CX connectivity and thalamocortical delay affect cortical and thalamic wave patterns**

202

203 In the previous section, we have shown that the randomly-selected unconnected RE-CX nodes produced  
204 spontaneous traveling wave patterns. We further investigated whether and how the change of RE-CX  
205 connectivity could predict the propagating wave behavior. Using the same setup as in **Figure 3b** (i.e.,  
206 nonzero delay and fully connected RE-CX), the cortical wave had a particular range of firing field (dashed  
207 box in **Fig. 4a**) due to RE inhibition.

208

209 We considered four distinct scenarios depending on the location and number of the triggered nodes. In  
210 the first scenario, in which the unconnected nodes were chosen within the range of cortical firing field, the  
211 particular node fired for a longer duration in time because it was not affected by RE inhibition (black  
212 dashed circle in **Fig. 4a**). However, because of the surrounding cortical firing refractoriness, it could not  
213 propagate spatially. In the second scenario, in which the unconnected node was at the corner of the  
214 cortical firing field (**Fig. 4b**), a cortical wave emerged in space-time because the cortical firing  
215 refractoriness was absent outside the field. The traveling wave initiated outside the dashed box, and then



216 became unconstrained once the refractoriness terminated (**Video S7**). In the third scenario, two  
217 unconnected points were selected to create two planar waves in opposing directions. Therefore, for a fixed  
218 set of connectivity and delay parameter, the traveling wave patterns (e.g. direction, area and speed) could  
219 be predicted (**Fig. 4d**). On the other hand, when the unconnected node was outside the cortical firing field,  
220 no wave was observed. It is important to note that the resulting cortical wave direction was field-size  
221 dependent. If there was more room to propagate outside the firing field, then waves could be obtained in  
222 other directions as well. The only necessity is that unconnected nodes would need to be at the edge of the  
223 cortical firing field.

224

225 In the fourth scenario, when the unconnected nodes were chosen in the form of a straight line (**Fig.**  
226 **4e**), and the resulting wave oscillated in reverse modes along that line (delay of 4 ms for  $t=1-10$  ms). Under  
227 the delay condition of 4 ms, two oscillations could be sustained until the RE inhibition disrupted the cortical  
228 wave ( $t=22-60$  ms) (**Video S8**). An initial threshold block was used to initiate a unidirectional wave (**Fig. 4e**,  
229 left panels of CX). If the thalamocortical delay was increased from 4 ms to 6 ms (from  $t=22$  ms on) during  
230 the course of simulation (**Fig. 4e**, bottom), then wave oscillations were sustained indefinitely in opposite  
231 directions (**Video S9**). A time-course of these neuronal oscillations are illustrated in **Figure 4f**, along with a  
232 1D space-time representation. Note that observing these oscillations in time, without a spatial readout, was  
233 insufficient to assess the reverse directions.

234

235 An interesting observation of traveling wave patterns was the rotating wave produced by the 2D  
236 thalamocortical model. **Figure 4g** illustrates one possible way of producing a rotating wave, in which the  
237 RE inhibition was used to break a planar wave, followed by a reduced inhibition level. A broken planar  
238 wave has tendency to curl around its tip to create a rotating wave [25-27]. If the RE inhibition was not  
239 reduced, the spiral would not get sufficient time to evolve (**Video S10**). **Figure 4h** shows the  
240 implementation of this method where the level of RE inhibition was reduced by ten folds at the moment of  
241  $t=28$  ms. As a consequence of reduced thalamic inhibition, a spiral cortical wave emerged and then  
242 continuously repeated itself (**Video S11**). The 1D space-time projection is illustrated in **Figure 4i**. As seen

243 in our simulations, a 1D space-time representation was insufficient to fully comprehend the underlying  
244 spiral wave, and only the 2D traveling wave representation could convey the complete picture. Together,  
245 the results suggest that based on the thalamocortical connectivity and transmission delays, one can  
246 potentially predict the characteristics of the spatiotemporal patterns that may ensue as a result of  
247 perturbations.

248

249

### 250 **Thalamic and cortical E/I imbalance alters traveling wave frequencies and speeds**

251

252 The E/I balance in neural circuits is critical for brain functions, and E/I imbalance may induce dysfunctional  
253 physiology such as epilepsy and seizures [28]. To investigate the effect of E/I balance on traveling wave  
254 characteristics, we focused our attention to a clustered cortical group, in which cortical neurons were  
255 nearly fully connected (99% intracortical connectivity).

256

257 First, we examined the impact of E/I imbalance in RE inhibition on the cortex. To help illustrate this  
258 point, we assumed that the cortex contained 99% excitatory neurons. In a standard closed-loop condition,  
259 we showed the 2D thalamic and cortical traveling wave dynamics (**Fig. 5a**, left), as well as their 1D  
260 projections (**Fig. 5a**, right). The RE and TC competed to trigger the cortical wave activity. In the presence  
261 of lower RE inhibition, TC excitation dominated, resulting in firing cortical neurons (**Fig. 5a**, red dots in  
262 white circle). These dots ultimately propagated to form cortical waves (**Video S1**). However, with increased  
263 RE inhibition, the effect of TC excitation decreased (due to a lack of firing within the white circle), resulting  
264 in fewer cortical traveling waves, or lower frequency (**Video S12**). Comparing the number of striped firing  
265 patterns in 1D projections (**Fig. 5b** vs. **Fig. 5a**), we observed a decrease in traveling wave frequency  
266 induced by increased RE inhibition. When we switched the cortical setup from 99% excitatory neurons  
267 back to the 4:1 exc-to-inh neuron ratio, we could still observe a similar effect (**Fig. 5c**). However, the  
268 differences in cortical wave frequency became less prominent as the percentage of excitatory neurons was  
269 decreased (**Fig. 5d**). This result may be ascribed to the fact that inhibitory neurons play a critical role for

270 the oscillatory frequency in the cortex. In contrast, the change in cortical wave speed was insignificant.  
271 This insignificant wave speed change was consistent irrespective of the number of excitatory neurons.  
272 Adding the effect of lateral RE inhibition to the three-layer model, may potentially alter the wave speed  
273 along with frequency.

274

275         Next, we examined the effect of imbalance in cortical excitation on traveling waves, by increasing  
276 the excitatory weights in the cortex by two folds. As a result, we observed a dramatic change in traveling  
277 wave patterns (**Fig. 5e, Video S13**), and a significant increase in both cortical wave frequency and wave  
278 speed (**Fig. 5f**). In the case of 4:1 exc-to-inh neuron ratio and normal model operating conditions, the  
279 excitable parameters were assumed such that the thalamus and cortex were synchronized at frequency.  
280 However, as we increased the cortical excitation by using a two-fold larger excitatory synaptic weight, the  
281 difference between the RE and CX frequencies became prominent (**Fig. 5f**). Together, the results suggest  
282 that E/I balance can alter the traveling wave frequency and speed. Our finding is also in line with the  
283 previous 1D model result that the traveling wave speed increases (logarithmically) with the synaptic  
284 coupling strength [18].

285

### 286 **Increased cortical variability reduces phase shift in wave activity**

287

288 Wave propagation is noticeable when there is a phase offset between adjacent firing neurons. This can  
289 only occur when a particular set of neurons are triggered and the resulting activity propagates to the  
290 neighboring neurons through synaptic connections. This effect will be lost if the nearby neurons also fire  
291 spontaneously. This leads us to hypothesize that even when synchronized oscillations are observed, there  
292 may be an intrinsic wave pattern that we fail to detect due to the external noise in the network.

293

294         To illustrate this point, we conducted computer simulations by calibrating the phase offset between  
295 adjacent neurons for varying noise levels at neuronal firing. The sources of external noise could be  
296 ascribed to variability in synaptic noise, thermal or conductance noise, and contributions from the

297 modulatory input. We introduced an additional degree of randomness to the basal activity of each neuron  
298 in the CX layer (**Methods**). The initiated wave pattern was gleaned from observing the thalamic activity, to  
299 which no noise was added. We considered two points in the CX layer (red and blue dots, separated by  
300 distance  $p$ ). When the noise level was small (**Fig. 6a**), the propagating cortical wave was discernible  
301 through the time-lapse images, and the phase shift was prominent (**Fig. 6a**, right panel). Increasing  
302 distance  $p$  led to a greater phase lag. However, when we gradually increased the variance of random  
303 noise in the cortical input (**Fig. 6b,c**), the phase shift decreased or even diminished. Nevertheless, the  
304 thalamic traveling wave patterns were still preserved in the latter cases. Together, these results suggest  
305 that cortical firing variability would impose challenges to observe the firing phase shift in cortical traveling  
306 wave patterns, highlighting the major differences between *in vivo* and *in vitro* conditions.

307

308

## 309 **DISCUSSION**

310

311 We have developed a 2D topographic network of the closed-loop thalamocortical system that produces a  
312 broad class of spatiotemporal wave patterns in the cortex and thalamus. Our computer simulations have  
313 shown that the propagating wave patterns are influenced by many factors such as intracortical and  
314 thalamocortical connectivity, E/I imbalance, thalamic inhibition, and thalamocortical delay. Our results are  
315 closely in-line with those generated by the 1D model with delay and spatially decaying connectivity [18].  
316 Furthermore, we show that the 2D traveling waves may display unique characteristics that are  
317 indiscernible in 1D projections or *in vitro* (isolated) conditions.

318

319 Traveling waves in the brain have been suggested to play important computational and functional  
320 roles including memory consolidation, processing of dynamic visual stimuli, sensorimotor integration, and  
321 multisensory discrimination and gating [4,10]. One of speculative roles of macroscopic traveling waves is  
322 to propagate and coordinate information across multiple brain regions in space and time; this has been  
323 recently verified by a human working memory study using ECoG recordings [29]. Recent experimental

324 findings have shown that thalamic traveling waves may be critical for the development of cortical  
325 representations from different sensory modalities [30]. Our results support the hypothesis that a  
326 potential role of the thalamus is to enable information being transferred between different cortical areas.

327

328 There are two major classes of traveling waves with respect to mechanisms. First, there are  
329 spontaneous or internally generated traveling waves, which are generated independent of external  
330 stimulus (such as slow waves, spindle waves, and ripple waves) [5,7,8]. The second class consists of  
331 stimulus-evoked traveling waves, which are time-locked to the stimulus presented to the sensory or motor  
332 system [6,31,32]. While the pattern generation of traveling waves vary, their exact wave patterns or  
333 characteristics (speed, direction and area) for information processing in a specific system are still  
334 incompletely understood. The speed of cortical traveling waves may have a wide range, ranging from 0.1-  
335 0.8 m/s for mesoscopic waves, to 1-10 m/s for macroscopic waves [10,33]. Multiple factors, including  
336 neural recording technique and spatial coverage, may contribute to diverse values of reported traveling  
337 wave speed. Our computer simulations predict that the cortical wave speed is influenced by lateral  
338 thalamic inhibition and excitatory cortical synaptic connections. In a closed-loop thalamocortical system,  
339 increasing the levels of cortical excitation increases the cortical wave speed. Our work also suggests that  
340 the inherent degree of noise may conceal the underlying phase shift in the traveling wave activity, yet  
341 synchronous oscillations may still retain a wave-nature. This further supports that cortical circuits are  
342 functionally two-dimensional [25], and implies the necessity to study 2D traveling wave dynamics or  
343 oscillatory spatiotemporal patterns using electrode grid (as opposed to 1D array) recordings.

344

345 Transmission delay between adjacent neuronal connections can cause bifurcations resulting in  
346 altered dynamics [18,24]. Our computer simulations have also confirmed that the thalamocortical delay can  
347 not only alter spatiotemporal dynamics, but also produce a wide range of traveling wave patterns. The  
348 delay parameter elicits a biphasic response, and an optimum delay exists for a particular neural field size  
349 that can generate the maximum number and duration of wave patterns. As evidenced from literature  
350 [34,35], the corticothalamic delay is more prominent compared to the thalamocortical delay. Throughout

351 our simulations, we have used a thalamocortical delay to produce traveling wave dynamics. However, as  
352 we demonstrated in **Fig. S3**, an asymmetric corticothalamic delay also produced similar cortical traveling  
353 wave alterations as the RE-CX connections were changed. In a closed-loop system, the exact location of  
354 the delay along the neural pathway (feedforward vs. feedback) did not change the logic behind wave  
355 pattern alterations, as the pattern formation theory necessitates only a long-range antagonist that is  
356 delayed in time when compared to the local activity [36]. Therefore, with the presence of thalamocortical or  
357 corticothalamic delay and the long-range inhibition, a diverse array of traveling wave patterns, including  
358 planar, radial, rotating and stationary waves, could be produced from our proposed 2D thalamocortical  
359 network. These results suggest that the wave patterns observed in cortical slices may emerge from  
360 thalamocortical or intracortical connectivity and altered excitation-inhibition levels rather than purely  
361 spontaneous activity.

362

363 Previous studies have reported how controlling different parameters of an excitable network can  
364 have drastic effects on spatiotemporal patterns. Among the critical parameters are *time-scale separation*  
365 (the delay between activator and inhibitor rise-times), *space-scale separation* (faster spreading inhibitor)  
366 and *threshold* (excitation-inhibition balance) [27]. Although most studies have considered a uniform  
367 excitable medium for altering wave patterns, these parameters can be also altered through manipulating  
368 interconnections in a layered system. As we have showed in the current study, the space-scale separation  
369 simply amounts to lateral thalamic inhibition that spreads faster than the cortical activity. Similarly, time-  
370 scale separation can be equivalent to the corticothalamic delay between long-range connections. The  
371 threshold of the system can easily be altered by changing the balance between excitatory and inhibitory  
372 synaptic strengths. Therefore, through indirectly manipulating these system parameters, it is theoretically  
373 possible to generate a wide range of complex spatiotemporal wave patterns [5,20].

374

375 Through numerical simulations, large-scale computational models may provide insights into the  
376 spatiotemporal dynamics of the thalamocortical network at a pathological brain state. The E/I imbalance is  
377 an important factor that contributes to epilepsy and seizures [28]. Our results have suggested that in a

378 clustered cortical network, increasing the E/I ratio drastically increases traveling wave speed and overall  
379 neuronal excitability, a phenomenon commonly observed in the pathological brain. For instance, traveling  
380 waves have been observed during epileptic seizures [37-39], but a complete understanding of their origin  
381 remains unclear. One potential mechanism of absence seizure (one kind of primary generalized seizures)  
382 is thalamic dysfunction [40-42]. Another plausible mechanism of recurrent seizure is E/I imbalance induced  
383 by stronger cortical excitation, which further causes the neuronal network to reach hyperexcitability [43].  
384 Our computer simulations have suggested that the closed-loop thalamocortical system is important for  
385 cortical wave propagation, and that the input of excitatory TC cells is necessary to maintain high oscillation  
386 frequencies, and subduing TC input through RE inhibition can significantly reduce thalamocortical  
387 oscillations. This is consistent with experimental results of a rat model that the thalamus is required to  
388 maintain cortical seizure oscillations, and that optogenetic inhibition of TC cell activity disrupts seizure  
389 oscillations [44]. Therefore, the dynamic properties of spatiotemporal traveling waves, such as the wave  
390 speed, direction and duration, may provide a window to examine pathological brain functions.

391

392 Our computational model distinguishes itself from other models in the literature. There are mainly two  
393 types of computational mechanisms that produce the traveling waves [20], one is the single neuronal  
394 oscillator, and the other based on independent oscillators with their own frequency and phase. Our model  
395 is essentially a coupled-oscillator model with short-range synaptic connections, which retains the wave  
396 generating characteristics through an all-or-none suprathreshold response. Such a model is capable of  
397 sustaining oscillations of different frequencies through Hopf bifurcations, without approximating dynamics  
398 through a sinusoidal function as in Kuramoto oscillators. The biophysical details of the Hodgkin-Huxley  
399 type neurons are merged into the firing threshold (activation-inhibition balance) of the system, where the  
400 network connectivity and synaptic inputs essentially alter neuron's proximity to the firing threshold. This is  
401 a simplifying assumption in order to reduce computation time because numerical simulations of  
402 spatiotemporal activity can be computationally cumbersome. Although we have used an approximation of  
403 the FHN model in the thalamocortical system, our wave propagation findings should be generalizable to  
404 other biophysically-based neuronal models. Many studies in the literature have used approximations of



405 biophysical details in order to analyze spatiotemporal patterns [45], since it is difficult to gain insight from  
406 models with high-dimensional parameter space. Because of these simplifications, the exact values of the  
407 parameters and their corresponding output wave speed/area values are not as important as is the relative  
408 change in the results when system parameters are altered.

409

410 In the literature, several 2D computational firing rate models have been developed for cortical  
411 structures [25,45-48], but very few have focused on the thalamocortical structure. To date, the available 1D  
412 computational models for thalamocortical systems have not explicitly modeled the network connectivity  
413 topography (i.e. the clustered intracortical connectivity), or did not jointly model transmission delay and  
414 lateral thalamic inhibition [18]. Furthermore, as we show here, the 1D projection has limited  
415 characterization capability of traveling wave patterns or properties. A previous 1D computational  
416 thalamocortical model has suggested that corticothalamic feedback operates on the thalamus through the  
417 excitation of GABAergic RE cells, therefore recruiting TC cells essentially through inhibition and rebound  
418 [49]. Although our proposed 2D thalamocortical model keeps this mechanism intact for the thalamus, it  
419 does not account for the detailed laminar structure of the cortex, nor does it account for the intra-laminar  
420 connections [17,50,51]. It is well known that the superficial layer and deep layer (L5/6) in the cortex have  
421 distinct cell density and cell types. The TC cells project to L4, and then propagate the activity to L2/3, and  
422 then to L5/6. The corticothalamic feedback initiates from L5/6 and projects back to RE. The corticothalamic  
423 collateral input to RE cells is stronger than the direct input to TC cells, emphasizing the modulatory aspect  
424 of the feedback. Incorporating more connectivity constraints within the cortical layers would further add  
425 details of the modeled neural circuitry [52]. Recent computer simulations have suggested that  
426 thalamocortical and intracortical laminar connectivity may change the properties of the sleep spindle wave  
427 [51]. Notably, our numerical simulations of 2D thalamocortical network were still on a relatively small scale,  
428 and some neurobiological details were not fully modeled. For instance, a separate treatment of  
429 thalamocortical and corticothalamic feedback may account for another level of complexity [53].  
430 Furthermore, the CX→TC feedback connection has been omitted since the CX→RE feedback is more  
431 predominant and stronger. Also, the bursting behavior of RE cells at rest has been omitted in our current



432 model and only tonic spiking has been focused upon. Introduction of bursting can have interesting effects  
433 on the ensuing wave – a topic that needs further exploration. Finally, we have only considered local intra-  
434 cellular connections and ignored long-range axonal connections within a layer. These short-range  
435 connections, for example, resulted in thalamic waves to be at a 45-degree shape in our numerical  
436 simulations. Future work will be required to investigate these issues in greater detail.

437

## 438 **METHODS**

### 439 **Network architecture and connectivity**

440 We developed a three-layer thalamocortical system by modeling each layer as a 2D sheet of 4-connectivity type (**Fig**  
441 **1a**). A layer consisted of a square matrix of neurons. Each neuron had an activator and inhibitor equation  
442 (approximation of the FitzHugh-Nagumo or FHN model), along with a synapse output equation. The activator of the  
443 model was analogous to the neuron's membrane potential, while the inhibitor was analogous to the recovery variable.  
444 The activator term in the original FHN model is a nonlinear term that allows self-enhancing feedback. We added a  
445 saturation approximation to curtail the upper bound of the activator, keeping the nonlinearity intact to allow fast,  
446 positive feedback. The inhibitor was the standard FHN-type slow negative feedback, which subdues the activator and  
447 creates an ensuing refractory period. The approximation to the FHN model was done to achieve more control over  
448 the system output dynamics [54]. Detailed parameters are presented in **Tables S1 and S2**. Although we used an  
449 approximation of the FHN model in the thalamocortical system, the wave propagation results are in principle  
450 generalizable to other biophysically-based neuronal models.

451 One feature of thalamocortical network is feedforward inhibition in the cortex. Thalamocortical afferents contact  
452 both excitatory neurons and local inhibitory neurons, which synapse on the same excitatory neurons. We assumed  
453 that the cortex has 20% inhibitory neurons and 80% excitatory neurons, and has an overall 25% connectivity. The  
454 cortex and thalamus are connected in closed loop where a sum of TC and RE activity influences the cortical activity,  
455 while the cortex projects feedback to the RE layer. The corticothalamic feedback connectivity between the cortex and  
456 the thalamus was set at 10%. Through the corticothalamic feedback, cortical discharges recruited large areas of the  
457 thalamus because of the divergent CX-to-RE and RE-to-TC axonal projections. Consequently, the thalamocortical  
458 network may generate a wide range of patterns of oscillations and synchrony. The schematic connections within the  
459 thalamocortical network are illustrated in **Fig. S4**.

460  
461 Within the thalamus (TC and RE), there are four types of operations: direct excitation, direct inhibition, lateral  
462 inhibition, and feedback disinhibition. Within the cortex, we assumed two types of topological structures (**Fig 2b**). The  
463 first type is a random network with uniform topological structure, and the second type is a locally clustered network.

464

### 465 **Neuron-type and simulation setup**

466 According to neuronal classification of Izhikevich's criterion [22], we assumed that thalamic neurons belong to Type-  
 467 3, which generates only a single spike following a step input. This allows neurons to exhibit oscillations when the  
 468 input is sufficiently large to cause a bifurcation, but the oscillation frequency remains relatively constant for a wide  
 469 range of input strengths. This neuron also exhibits a rebound spike following an inhibitory synaptic input. The mutual  
 470 recruitment of excitatory spikes and inhibitory rebound spikes created the lurching wave phenotype that we contrast  
 471 with the smooth wave [55]. For the purpose of wave propagation, we only considered the tonic firing mode in thalamic  
 472 neurons. We also assumed that cortical neurons belong to Type-1/2, which exhibits a wide range of oscillation  
 473 frequencies for different input strengths. This allows cortical neurons to have varying phase oscillations. However, at  
 474 the bifurcation of Type-1/2 neurons, they do not exhibit rebound spikes to inhibitory synapses.

475

476 **Layer 1: Thalamic relay cells (TC) layer** with activator  $T_a$ , inhibitor  $T_i$ , synapse  $T_s$

477

$$\begin{aligned} \frac{dT_a}{dt} &= -a_1 T_a - a_2 T_i T_a + \frac{a_3 T_a^2}{T_a^2 + a_4} + a_5 + T_{inp} \\ \frac{dT_i}{dt} &= -c_1 T_i + c_2 T_a \\ \frac{dT_s}{dt} &= \frac{0.5(1 + \tanh(120(T_a - 0.1))) - T_s}{t_1(s_1 - 0.5(1 + \tanh(120(T_a - 0.1))))} \end{aligned}$$

478 We assumed that the thalamic neurons were set up as Type-3 neuron [22]. The coefficients  $a_1, a_2, a_3, a_4, a_5$  represent  
 479 the parameters that determine the activator dynamics, more specifically the shape of the activator nullcline (**Fig. S1c**)  
 480 to give it an inverted-N-shape as is typical of FitzHugh-Nagumo systems. The coefficients  $c_1$  and  $c_2$  determine the  
 481 slower inhibitor dynamics and produce the inhibitor nullcline a linear shape. The input to the TC layer  $T_{inp}$  consisted  
 482 of inhibitory synapses from the RE layer ( $R_s$ ) through a connectivity matrix  $C_{TH}$ .

483

$$T_{inp} = -w_{RE-TC} C_{TH} R_s (T_a + i_p)$$

484 where  $C_{TH}$  connected every TC element to the surrounding four nearest neighboring RE neurons (excluding itself).  
 485 An inhibitory synapse to TC resulted in a post-inhibitory rebound spike. Each TC neuron sent an excitatory synapse  
 486 to a corresponding RE neuron, and to the cortical layer.

487 **Layer 2: Thalamic reticular nuclei (RE) layer** with activator  $R_a$ , inhibitor  $R_i$ , synapse  $R_s$

$$\frac{dR_a}{dt} = -a_1 R_a - a_2 R_i R_a + \frac{a_3 R_a^2}{R_a^2 + a_4} + a_5 + R_{inp}$$

$$\frac{dR_i}{dt} = -c_1 R_i + c_2 R_a$$

$$\frac{dR_s}{dt} = \frac{0.5(1 + \tanh(120(R_a - 0.1))) - R_s}{t_1(s_1 - 0.5(1 + \tanh(120(R_a - 0.1))))}$$

488

489 The RE parameters for the activator-inhibitor dynamics were chosen to be same as the TC case for Type-3 neurons.  
 490 The input to the RE layer  $R_{inp}$  consisted of four parts: (i) excitatory synapses from TC layer; (ii) excitatory  
 491 corticothalamic inputs from CX; (iii) inhibitory corticothalamic inputs from CX; and (iv) intra-RE excitatory connections  
 492 that generate lateral thalamic inhibition on the cortex.

$$R_{inp} = \begin{cases} i) w_{TC-RE} T_s R_a, & \text{excitatory input from TC synapse } T_s \\ ii) W_e M_{sparse} C_s R_a, & \text{excitatory input (weight matrix } W_e) \text{ from CX synapse } C_s, \\ & \text{(replaced by } C_{delay} \text{ for corticothalamic delay)} \\ & \text{multiplied by sparsity matrix } M_{sparse} \\ iii) -W_i M_{sparse} C_s (R_a + i_p), & \text{inhibitory input (weight matrix } W_i) \text{ from CX synapse } C_s, \\ & \text{(replaced by } C_{delay} \text{ for corticothalamic delay)} \\ & \text{multiplied by sparsity matrix } M_{sparse} \\ iv) w_{re} C_{TH} R_s R_a, & \text{excitatory input (weight: } w_{re}) \text{ from surrounding RE} \\ & \text{synapses } R_s, \text{ with connectivity matrix} \\ & C_{TH} \text{ that connects to four adjacent neurons} \end{cases}$$

493

494 A corticothalamic delay was introduced in the model by using a delayed CX input ( $C_{delay}$  instead of  $C_s$ ) to the cortex.  
 495 This was achieved by passing the CX synapse  $C_s$  through multiple post-inhibitory rebound spikes before it reached  
 496 the RE layer. Each delay reaction resulted in a simulation delay of 2 ms. Adding reactions would slow down overall  
 497 simulation time; therefore, we incorporated a transmission delay up to a maximum of 6 ms. Each delay of 2 ms came  
 498 from three reactions---exactly similar to those of the Type-3 neurons described in the TC layer with the input being  
 499 the CX synapse  $C_s$ . The delay essentially occurred due to the wait-time before the rebound spike. The delay could be  
 500 increased by additional 2 ms by incorporating similar rebound-spike delays, using the first delay synapse as the input,

501 and so on.

502 The weight matrices  $W_e$  and  $W_i$  consisted of the excitatory and inhibitory weights from the excitatory and  
 503 inhibitory neurons in the cortex, respectively. We assumed that the RE-CX connections were symmetric and sparse,  
 504 as characterized by a binary matrix  $M_{sparse}$ . The cortical input to the TC layer was considered negligible when  
 505 compared to the corticothalamic input to RE. The fourth input, intra-RE excitation, was used only in the reduced RE-  
 506 CX model case (when the input (i) in  $R_{inp}$  was removed), which was aimed to mimic the effect of lateral RE inhibition  
 507 on CX. Furthermore, the net input to a RE neuron was saturated at a minimum to prevent numerical instabilities.

508 **Layer 3: Cortex (CX) layer** with activator  $C_a$ , inhibitor  $C_i$ , synapse  $C_s$

$$\begin{aligned} \frac{dC_a}{dt} &= -a_1 C_a - a_2 C_i C_a + \frac{a_3 C_a^2}{C_a^2 + a_4} + a_5 + C_{inp} \\ \frac{dC_i}{dt} &= -d_1 C_i + d_2 \frac{C_a^3}{d_3 + C_a^3} + d_4 \\ \frac{dC_s}{dt} &= \frac{0.5(1 + \tanh(120(C_a - 0.1))) - C_s}{t_1(s_1 - 0.5(1 + \tanh(120(C_a - 0.1))))} \end{aligned}$$

509  
 510 The cortical inhibitory neurons were set up as Type-1/2 neuron, which do not exhibit the inhibitory postsynaptic  
 511 rebound. Instead, they incorporate saddle-node bifurcations that allow different spiking frequencies for different input  
 512 strengths. The input to the CX layer  $C_{inp}$  consisted of five parts: (i) excitatory synapses from TC layer; (ii) inhibitory  
 513 inputs from RE layer with a delay parameter; (iii) excitatory inputs from neighboring cortex neurons; (iv) inhibitory  
 514 inputs from neighboring cortex neurons; and (v) random Gaussian noise input.

$$C_{inp} = \begin{cases} i) w_{TC-CX} W_{sparse} C_a, & \text{delayed excitatory input from TC synapse} \\ & \text{multiplied by sparsity matrix } W_{sparse} \text{ and weights } w_{TC-CX} \\ ii) - w_{RE-CX} W_{sparse} R_s (C_a + i_p), & \text{inhibitory input from RE synapses } R_s \\ & \text{(replaced by } R_{delay} \text{ for thalamocortical delay)} \\ & \text{multiplied by sparsity matrix } W_{sparse} \text{ and weights } w_{RE-CX} \\ iii) W_e \frac{k_n}{\sqrt{N}} X_{sparse} C_s, & \text{excitatory input (weight matrix } W_e) \text{ from CX synapse } C_s, \\ & \text{multiplied by a cortical sparsity matrix } X_{sparse} \\ iv) - W_i \frac{k_{in}}{\sqrt{N}} X_{sparse} C_s, & \text{inhibitory input (weight matrix } W_i) \text{ from CX synapse } C_s, \\ & \text{multiplied by cortical sparsity matrix } X_{sparse} \\ v) \mathcal{N}(\mu, \sigma), & \text{a random input modeled as white Gaussian noise} \end{cases}$$

515

516 A thalamocortical delay was introduced in the model by using a delayed RE input ( $R_{delay}$  instead of  $R_s$ ) to the  
 517 cortex. This was achieved by passing the RE synapse  $R_s$  through multiple post-inhibitory rebound spikes before it  
 518 reached the cortex. Each delay reaction resulted in a simulation delay of 2 ms. Adding reactions slowed down overall  
 519 simulation time, therefore, we incorporated a transmission delay up to a maximum of 6 ms. Each delay of 2 ms came  
 520 from three reactions---exactly similar to those of the Type-3 neurons described in the TC layer with the input being  
 521 the RE synapse  $R_s$ . The delay occurred due to the wait-time before the rebound spike. The delay could be increased  
 522 by additional 2 ms by incorporating similar rebound-spike delays, using the first delay synapse as the input, and so  
 523 on.

524 We assumed that the intracortical connectivity was sparse (characterized by a binary and symmetric matrix  
 525  $X_{sparse}$ ), which incorporated the effect of clustering or rearrangement of cortical cell connections. For modeling  
 526 simplicity, we assumed that the thalamocortical connections were symmetric (i.e.,  $W_{sparse} = M_{sparse}$ ). We also  
 527 assumed that the exc-to-inh neuron ratio was 4:1 in the cortex.

528

## 529 Numerical simulations and traveling speed characterization

530 The neural equations were numerically simulated using the SDE toolbox of MATLAB (MathWorks) [56], using a 2D  
 531 array for a neural layer with absorbing (high-threshold) boundary conditions. Kymographs were calculated from the  
 532 2D activity through line-scans in time. In our model, each layer consisted of 3,600 neurons (array of 60×60), the  
 533 computer simulation time for the proposed three-layer network was ~600 s for 400-ms duration. Statistics were done

534 by varying the (feedback, feedforward and intracortical) network connectivity and the arrangement of excitatory  
535 neurons in the cortex. Student's t-test was used to calculate statistical significance.

536 To measure the traveling wave speed, a custom MATLAB script was used. Briefly, the wave front was  
537 segmented at subsequent frames of videos. Based on these segmentations, the number of patches and averaged  
538 area was computed. To measure the averaged wave speed, the distance from each pixel on the boundary of a wave  
539 front in frame  $n+1$  to the closest edge of a wave in frame  $n$  was computed. Our computed wave speed was in  
540 arbitrary unit (a.u.). To put that in a perspective, if we record  $60 \times 60$  array neuronal activity from a 2D multielectrode  
541 array (MEA) of  $\sim 24 \times 24$  mm<sup>2</sup>, then each frame of the wave videos reflects the 2-ms temporal resolution such that the  
542 simulated wave speed is  $\sim 100$ -300 cm/s.

543

#### 544 **ACKNOWLEDGMENTS**

545 We thank M. Bazhenov, J.D. Murray, Y. Hu, J. Rinzel, and W. Truccolo for their valuable comments. This  
546 research was partially supported by the DAPRA under contract number HR0011-16-0139 (P.A.I.), NSF  
547 grant CBET-1835000 (Z.S.C.), NIH grants R01-NS100065 (Z.S.C.) and R01-MH118928 (Z.S.C.). The  
548 funders had no role in study design, data collection and analysis, decision to publish, or preparation of the  
549 manuscript.

550

#### 551 **AUTHOR CONTRIBUTIONS**

552 P.A.I. and Z.S.C. conceived the study. The model was developed by S.B and P.A.I aided by M.B.L.C. S.B.  
553 carried out the simulations. S.B., P.A.I and Z.S.C. wrote the manuscript.

554

#### 555 **ORCID IDs**

556 0000-0002-0957-7530 (S. Bhattacharya)

557 0000-0002-0840-155X (P. A. Iglesias)

558 0000-0002-6483-6056 (Z. S. Chen)

559

#### 560 **COMPETING FINANCIAL INTERESTS**

561 The authors declare no competing financial interests.

562



## 563 References

- 564 1. Lubenov EV, Siapas AG. Hippocampal theta oscillations are traveling waves. *Nature* **459**, 534-539 (2009).
- 565 2. Rubino D, Robbins KA, Hatsopoulos NG. Propagating waves mediate information transfer in the motor  
566 cortex. *Nat. Neurosci.* **9**, 1549-1557 (2006).
- 567 3. Takahashi K, Kim S, Coleman TP, Brown KA, Suminski AJ, Best MD, Hatsopoulos NG. Large-scale  
568 spatiotemporal spike patterning consistent with wave propagation in motor cortex. *Nat. Comm.* **6**, 7169  
569 (2015).
- 570 4. Muller L, Destexhe A. Propagating waves in thalamus, cortex and thalamocortical system: experiments and  
571 models. *J. Physiol.* **106**, 222-238 (2012).
- 572 5. Muller L, Piantoni G, Koller D, Cash SS, Halgren E, Sejnowski TJ. Rotating waves during human sleep  
573 spindles organize global patterns of activity that repeat precisely through the night. *eLife*, **5**, e17267 (2016).
- 574 6. Sato TK, Nauhaus I, Carandini M. Traveling waves in visual cortex. *Neuron* **75**, 218-229 (2012).
- 575 7. Massimini M, Huber R, Ferrarelli F, Hill S, Tononi S. The sleep slow oscillation as a traveling wave. *J.*  
576 *Neurosci.* **24**, 6862-6870 (2004).
- 577 8. Patel J, Schomburg EW, Berenyi A, Fujisawa S, Buzsaki G. Local generation and propagation of ripples  
578 along the septotemporal axis of the hippocampus. *J. Neurosci.* **33**, 17029-17041 (2013).
- 579 9. Muller L, Reynaud A, Chavane F, Destexhe A. The stimulus-evoked population responses in visual cortex of  
580 awake monkey is a propagating wave. *Nat. Comm.* **5**, 3675 (2013).
- 581 10. Muller L, Chavane F, Reynolds J, Sejnowski TJ. Cortical travelling waves: mechanisms and computational  
582 principle. *Nat. Rev. Neurosci.* **19**, 255-268 (2018).
- 583 11. Steriade M, McCormick DA, Sejnowski TJ. Thalamocortical oscillations in the sleeping and aroused brain.  
584 *Science* **262**, 679-685 (1993).
- 585 12. Timofeev I, Bazhenov M. Mechanisms and biological role of thalamocortical oscillations. In Columbus F  
586 (editor), *Trends in Chronobiology Research* (pp. 1-47, Nova Science Publisher) (2005).
- 587 13. Destexhe A, Bal T, McCormick DA, Sejnowski TJ. Ionic mechanisms underlying synchronized oscillations  
588 and propagating waves in a model of ferret thalamic slices. *J. Neurophysiol.* **76**, 2049-2070 (1996).
- 589 14. Golomb D, Wang XJ, Rinzel J. Propagation of spindle waves in a thalamic slice model. *J. Neurophysiol.* **75**,  
590 750-769 (1996).
- 591 15. Rinzel J, Terman D, Wang XJ, Ermentrout B. Propagating activity patterns in large-scale inhibitory neuronal  
592 networks. *Science* **279**, 1351-1355 (1998).

- 593 16. Destexhe A, Sejnowski TJ. Interactions between membrane conductances underlying thalamocortical slow-  
594 wave oscillations. *Physiol. Rev.* **83**, 1401-1453 (2003).
- 595 17. Lumar ED, Edelman G.M., Tononi G. Neural dynamics in a model of the thalamocortical systems. I. Layers,  
596 loops and the emergence of fast synchronous rhythms. *Cerebral Cortex*, **7**, 207-227 (1997).
- 597 18. Golomb D, Ermentrout GB. Continuous and lurching traveling pulses in neuronal networks with delay and  
598 spatially decaying connectivity. *Proc. Natl. Acad. Sci. USA* **96**, 13480-13485 (1999).
- 599 19. Kilpatrick ZP, Ermentrout GB. Response of traveling waves to transient inputs in neural fields. *Phys. Rev. E*,  
600 **85**, 021910 (2012).
- 601 20. Ermentrout GB, Kleinfeld D. Traveling electrical waves in cortex: insights from phase dynamics and  
602 speculation on a computational role. *Neuron*, **23**, 33-44 (2001).
- 603 21. Moldakarimov S, Bazhenov M, Feldman DE, Sejnowski TJ. Structured networks support sparse travelling  
604 waves in rodent somatosensory cortex. *Proc. Natl. Acad. Sci. USA* **115**, 5277-5282 (2018).
- 605 22. Izhikevich EM. *Dynamical Systems in Neuroscience: the Geometry of Excitability and Bursting* (MIT Press,  
606 2007).
- 607 23. Litwin-Kumar A, Doiron B. Slow dynamics and high variability in balanced cortical networks with clustered  
608 connections. *Nat. Neurosci.* **15**, 1498-1505 (2012).
- 609 24. Roxin A, Brunel N, Hansel D. Role of delays in shaping spatiotemporal dynamics of neuronal activity in large  
610 networks. *Phys. Rev. Lett.* **94**, 238103 (2005).
- 611 25. Huang X, Troy WC, Yang Q, Ma H, Laing CR, Schiff SJ, Wu J-Y. Spiral waves in disinhibited mammalian  
612 neocortex. *J. Neurosci.* **24**, 9897-9902 (2004).
- 613 26. Zykov V, Krekhov A, Bodenschatz E. Fast propagation regions cause self-sustained reentry in excitable  
614 media. *Proc. Natl. Acad. Sci. USA* **114**, 1281-1286 (2017).
- 615 27. Bhattacharya S, Iglesias PA. Controlling excitable wave behaviors through the tuning of three  
616 parameters. *Biol. Cyber.* **113**, 61-70 (2019).
- 617 28. Eichler SA, Meier JC. E-I balance and human disease—from molecules to networking. *Front. Mol. Neurosci.*  
618 **1**, 2 (2008).
- 619 29. Zhang H, Watrous AJ, Patel A, Jacobs J. Theta and alpha oscillations are traveling waves in the human  
620 neocortex. *Neuron*, **98**, 1-13 (2018).
- 621 30. Moreno-Juan V, et al. Prenatal thalamic waves regulate cortical area size prior to sensory processing. *Nat.*  
622 *Comm.* **8**, 14172 (2017).

- 623 31. Lozano-Soldevilla D, VanRullen R. The hidden spatial dimension of alpha: 10-Hz perceptual echoes  
624 propagate as periodic traveling waves in the human brain. *Cell Rep.* **26**, 374-380 (2019).
- 625 32. Klimesch W, Hanslmayr S, Sauseng P, Gruber WR, Doppelmayr M. P1 and traveling alpha waves: evidence  
626 for evoked oscillations. *J. Neurophysiol.*, **97**, 1311-1318 (2007).
- 627 33. Pattern TM, Rennie CJ, Robinson PA, Gong P. Human cortical traveling waves: dynamical properties and  
628 correlations with responses. *PLoS ONE* **7**: e38392 (2012).
- 629 34. Steriade M, Jones EG, Llinas RR. *Thalamic Oscillations and Signaling*. Wiley, New York (1990).
- 630 35. Roberts JA, Robinson PA. Modeling absence seizure dynamics: implications for basic mechanisms and  
631 measurement of thalamocortical and corticothalamic latencies. *J. Theor. Biol.* **253**, 189-201 (2008).
- 632 36. Gierer A, Meinhardt H. A theory of biological pattern formation. *Kybernetik*, **12**, 30-39 (1972).
- 633 37. Gonzalez-Ramirez LR. A biologically constrained, mathematical model of cortical wave propagation  
634 preceding seizure termination. *PLoS Comp. Biol.* **11**, e1004065 (2015).
- 635 38. Wagner EB, Truccolo W, Wang J, Nurmikko AV. Spatiotemporal dynamics of optogenetically induced and  
636 spontaneous seizure transitions in primary generalized epilepsy. *J. Neurophysiol.* **113**, 2321-2341 (2015).
- 637 39. Martinet L-E. et al. Human seizures couple across spatial scales through traveling wave dynamics. *Nat.*  
638 *Comm.* **8**, 14896 (2017).
- 639 40. Crunelli V, Leresche N. Childhood absence epilepsy: genes, channels, neurons and networks. *Nat. Rev.*  
640 *Neurosci.* **3**, 371-382 (2002).
- 641 41. Hu B, et al. The generation mechanism of spike-and-slow wave discharges appearing on thalamic relay  
642 nuclei. *Sci. Rep.* **8**, 4953 (2018).
- 643 42. Gotman J, Grova C, Bagshaw A, Kobayashi E, Aghakhani Y, et al. Generalized epileptic discharges show  
644 thalamocortical activation and suspension of the default state of the brain. *Proc. Natl. Acad. Sci. USA* **102**,  
645 15236-15240 (2005).
- 646 43. Dehghani N, et al. Dynamic balance of excitation and inhibition in human and monkey neocortex. *Sci. Rep.* **6**,  
647 23176 (2016).
- 648 44. Paz J, et al. Closed-loop optogenetic control of thalamus as a tool for interrupting seizures after cortical  
649 injury. *Nat. Neurosci.* **16**, 64-70 (2013).
- 650 45. Byrne A, Avitabile D, Coombes S. A next generation neural field model: the evolution of synchrony within  
651 patterns and waves. *Phys. Rev. E* **99**, 012313 (2019).

- 652 46. Kilpatrick ZP, Bressloff PC. Spatially structured oscillations in a two-dimensional excitatory neuronal network  
653 with synaptic depression. *J. Comp. Neurosci.* **28**: 193-209 (2010).
- 654 47. Rankin J, Chavane F. Neural field model to reconcile structure with function in primary visual cortex. *PLoS*  
655 *Comp. Biol.* 2017; **13**: e1005821 (2017).
- 656 48. Huang C, Ruff DA, Pyle R, Rosenbaum R, Cohen MR, Doiron B. Circuit models of low-dimensional shared  
657 variability in cortical network. *Neuron* **101**, 337-348 (2019).
- 658 49. Destexhe A, Contreras, D, Steriade M. Mechanisms underlying the synchronizing action of corticothalamic  
659 feedback through inhibition of thalamic relay cells. *J. Neurophysiol.* **79**, 999-1016 (1998).
- 660 50. Izhikevich EM, Edelman GM. Large-scale model of mammalian thalamocortical systems. *Proc Natl Sci Acad*  
661 *USA*, **105**, 3593-3598 (2008).
- 662 51. Krishnan GP, Rosen BQ, Chen JY, Muller L, Sejnowski TJ, Cash SS, Halgren E, Bazhenov M.  
663 Thalamocortical and intracortical laminar connectivity determines sleep spindle properties. *PLoS Comp Biol.*  
664 **14**, e1006171 (2018).
- 665 52. O’Kusky J, Colonnier M. A laminar analysis of the number of neurons, glia, and synapses in the adult cortex  
666 (area 17) of adult macaque monkeys. *J. Comp. Neurol.* **210**, 2780-290 (1982).
- 667 53. Hashemi M, Hutt A, Hight D, Sleigh J. Anesthetic action on the transmission delay between the cortex and  
668 thalamus explains the beta-buzz observed under propofol anesthesia. *PLoS ONE*, **12**, e0179286 (2017).
- 669 54. Bhattacharya S, Iglesias PA. The threshold of an excitable system serves as a control mechanism for noise  
670 filtering during chemotaxis. *PLoS ONE* **13**, e0201283 (2018).
- 671 55. Terman DH, Ermentrout GB, Yew AC. Propagating activity patterns in thalamic neuronal networks. *SIAM J.*  
672 *Appl. Math.* **61**, 15780-1604 (2001).
- 673 56. Picchini U. SDE toolbox: Simulation and estimation of stochastic differential equations with MATLAB,  
674 <http://sdetoolbox.sourceforge.net/> (2007).
- 675 57. Destexhe A, Contreras D. The fine structure of slow-wave sleep oscillations: from single neurons to large  
676 networks. In: Hutt A. (eds) *Sleep and Anesthesia*. Springer Series in Computational Neuroscience, vol.  
677 15. Springer, New York, NY, pp. 69-105 (2011).
- 678

679 **Figure legends**

680

681 **Figure 1. Thalamocortical model and simulated traveling waves.** (a) Two-dimensional (2D) schematic  
682 representation of the computational model with a three-layer architecture: CX (cortex, containing both  
683 excitatory and inhibitory cells), RE (inhibitory thalamic reticular nuclei cells) and TC (excitatory  
684 thalamocortical relay cells). RE-TC are reciprocally connected. The network is connected in a closed loop.  
685 (b) Traveling waves produced by the computational model operated in an open loop (i.e., without CX-RE  
686 connection, 99% excitatory cortical neurons). Dynamic traveling wave patterns are shown (assuming a  
687 dense intracortical connectivity); arrows indicate wave directions. Color bar shows the scale of neuronal  
688 activity (a.u.). (c) One-dimensional (1D) projection of the traveling waves to indicate the different wave  
689 dynamics between the thalamus and the cortex. The gap between the white dashed lines in the thalamus  
690 shows the lurching pattern as the wave is staggered in time; in contrast, the cortical wave is smooth. (d)  
691 Computational model operated in a closed loop (with 10% CX-RE connections and 80% excitatory  
692 neurons) results in oscillations with random wave directions. (see **Video S2**) (e) 1D projections of CX and  
693 RE traveling wave dynamics. (f) The average cortical wave speed was significantly faster than the thalamic  
694 wave speed ( $p < 0.0001$  from 5 simulations, student's t-test). Error bar represents standard error of mean  
695 (SEM).

696 **Figure 2. Network connectivity controls patterns of spontaneous traveling waves.** (a) Traveling wave  
697 area was reduced with decreasing overall intracortical connectivity. Error bar represents SEM from 5  
698 simulations. (b) Schematic showing different CX arrangement: fully connected (left), uniformly connected  
699 with lower connectivity (middle), and clustered and with the same overall connectivity (right). We assumed  
700 that the RE and TC layers have uniform arrangement. (c) Traveling waves produced by the computational  
701 model operated in a closed loop (with overall 25% intracortical connectivity and a 90% intra-connected  
702 cluster). The unshaded portion in the CX illustrates the clustered region. (d) Comparison of traveling wave  
703 area between the inside and outside the clustered region. The wave activity was prominent only within the  
704 cluster (zoomed in a snapshot via a blue box), whereas only puncta-type activity was seen outside the  
705 cluster (zoomed in a snapshot via a red box). (e) Disconnected thalamocortical network with only CX  
706 setting: two clusters, both 99% connected, with overall 31% intracortical connectivity. The cluster positions  
707 are shown on the leftmost panel. Activity was triggered stochastically within the red cluster. Because of the  
708 weak connectivity between two clusters, the activity in the red cluster did not reach the blue cluster. (f)  
709 Same as panel e, except with the thalamus connected in a closed loop. The thalamic wave enabled  
710 communications between the two clusters (see **Video S4**).

711

712

713 **Figure 3. Transmission delay between the cortex and thalamus changes the stimulus-evoked**  
714 **traveling wave patterns.** (a) A reduced thalamocortical model showing interactions between CX and  
715 inhibitory RE cells with lateral inhibition. A nonzero delay parameter was introduced between RE and CX  
716 connection to account for axonal conduction delays. We assumed that CX was fully connected with purely  
717 excitatory neurons. (b) Impact of different thalamocortical delay parameters on CX wave dynamics  
718 (assuming fully connected RE-CX). With an increased delay, the CX wave could propagate further and  
719 longer. In contrast, lateral inhibition allowed the RE wave to propagate unrestricted regardless the delay.  
720 (c) A 90% connected RE-CX condition, where the red dots denote the cortical neurons that receive no RE  
721 inhibition. For a specific thalamocortical delay of 2 ms, the uninhibited points produced new CX wave that  
722 propagated in various directions (indicated by black arrows), and RE wave activity ultimately disappeared  
723 (see **Video S5**). (d) With an increased delay of 4 ms, dynamic wave activity emerged. In this illustration,  
724 radial (t=8 ms), planar (t=52 ms), and rotating (t=124 ms) waves were produced (see **Video S6**). (e)  
725 Comparison of the wave activity duration with respect to different delay parameters. Their non-monotonic  
726 relationship suggests an optimal delay regime in the thalamocortical network. Error bar represents SEM.

727 **Figure 4. RE-CX connectivity and thalamocortical delays determine cortical and thalamic wave**  
728 **patterns. (a) Left:** A zoomed-in CX circuit showing neurons (red points) that are disconnected to RE.  
729 **Right:** Traveling wave dynamics in the CX and RE with lateral RE inhibition. Black circle indicates the  
730 uninhibited point. When this uninhibited point fired, it could not produce a wave because of the surrounding  
731 CX refractory zone that received RE inhibition. **(b)** Similar as panel **a** except the unconnected point was  
732 located at the edge of the CX firing zone (smaller dashed box). Black arrow shows the wave direction. **(c)**  
733 Changing unconnected point locations altered wave directions. **(d)** Schematic summarizing how the  
734 location of the uninhibited nodes produces traveling waves with various directions. **(e) i:** The  
735 unconnected points were in a straight line so that the resulting wave oscillated in reverse directions along  
736 that line. **ii:** For a delay of 4 ms, two oscillations were allowed until RE disrupted the waves (see **Video**  
737 **S8**). **iii:** By increasing delay (6 ms), infinite oscillations sustained in opposite directions after the initial  
738 trigger (see **Video S9**). **(f)** Space-time projections of traveling waves for two delay parameters used in **ii**  
739 and **iii**. **(g)** Schematic showing how the RE inhibition can be used to break the CX wave. A broken wave  
740 tends to curl around a tip. **(h)** An illustration of generating a rotating cortical wave, which emerged when  
741 RE inhibition was reduced at time  $t_0$  (see **Video S11**). **(i)** Space-time projection of the wave shown in panel  
742 **h**.



743 **Figure 5. Cortical and thalamic E/I balance alters traveling wave speed and frequency.** (a)  
744 Spatiotemporal activity produced by a closed-loop 2D thalamocortical network (10% RE-CX connectivity,  
745 fully connected CX with 100% excitatory neurons). Repeated cortical cell firings occurred due to TC  
746 excitatory inputs (dots in the dashed white circle). These dots propagated as a traveling wave (see 1D  
747 projection shown on the right). (b) RE inhibition weights on CX were increased which reduced the CX firing  
748 frequency (compare triggering dots within the white circle in panels a and b). The black dots in the bottom  
749 right panel indicate how spatial frequencies were sampled. (c) Similar setup as panel b except with 80%  
750 cortical excitatory neurons. (d) Comparison of the cortical wave speed and oscillation frequency between  
751 two levels of RE inhibition (1x vs. 300x). All error bars represent SEM. (e) Traveling waves induced by  
752 increased CX excitatory weights (10% RE-CX connectivity and 99% intracortical connectivity with 80%  
753 excitatory neurons). As seen in space-time projections, wave activity was significantly increased (in  
754 comparison with **Fig. 1**). (f) Cortical wave frequency and speed increased as the CX excitatory weights  
755 were multiplied by two folds ( $p$ -values obtained from 5 simulations, student's t-test).

756 **Figure 6. Cortical wave dynamics and phase shift varied with stochastic inputs.** (a) CX activity (no  
757 external noise) was only driven by thalamocortical closed-loop connections initiated with manual triggers,  
758 assuming fully connected CX with excitatory neurons. The CX phase shifts in waves were measured by  
759 the lag of the activity of the red and blue points. In simulations, the blue point remained unchanged and the  
760 red point was moved further away (such that their distance  $p$  was increased). Five temporal traces (each  
761 for a different  $p$  distance value) of red and blue points are plotted on the right panel. The dashed lines  
762 indicate the phase shift as two points move further apart. (b) Extra random noise (zero-mean Gaussian  
763 with variance 2) was introduced to the CX input (**Methods**). Phase shift was noticeably reduced. (c)  
764 Additional cortical variability with increased noise variance (from 2 to 4) induced nearly synchronous  
765 oscillations regardless of the point location; and the prominent wave structure was completely lost.

766

767

## 768 **Supporting Information**

769 **Fig S1.** (a) Diagram of the thalamocortical circuit (adapted from Destexhe and Contreras, 2011). (b)  
770 Illustration of the open and closed-loop connections between the CX, TC and RE. (c) Illustrations of phase  
771 plane for Type-1/2 and Type-3 neurons (Izhikevich's classification) used in our computer simulations. (d)  
772 Comparison of open-loop (left) and closed-loop (right) traveling wave dynamics (shown in the form of  
773 space-time projections) of the thalamocortical system when both the thalamus and cortex were manually  
774 triggered at a point initially.

775

776 **Fig S2.** (a) Illustration of how lurching behavior of thalamus was lost with different RE-CX connectivity  
777 percentages (10%, 50% and 90%). A higher percentage of CX-RE connectivity eliminated the time-gap  
778 between subsequent triggers (highlighted in white dashed circle) due to cortical inputs. (b) Illustration of  
779 the CX and RE traveling waves with overall 25% intracortical connectivity. In this case, the cortical wave  
780 was punctate and discontinuous, thereby being difficult to detect. (c) As the percentage of excitatory  
781 cortical neurons was reduced, the CX wave speed decreased, whereas the RE wave speed increased  
782 slightly. Error bars represent SEM (n=5 simulations).

783

784 **Fig S3.** (a) The RE-CX model with corticothalamic delay (in comparison with the thalamocortical delay  
785 shown in **Figure 3a**). (b) Effect of different corticothalamic delay parameters on cortical wave patterns. (c)  
786 An instance of cortical traveling wave dynamics using a corticothalamic delay of 2 ms. (d) Illustration of  
787 diverse cortical and thalamic wave pattern formation using a sparse random connectivity matrix. (e) An  
788 instance of generating rotating cortical wave (similar to **Figure 4h**). RE inhibition was reduced at time  $t_0$ .

789

790 **Fig S4.** Graphical illustration of thalamocortical network connections, with green indicating excitatory  
791 (exc), red indicating inhibitory (inh), and blue indicating mixed excitatory and inhibitory

792 connections, respectively.  $T_s$ ,  $R_s$ , and  $C_s$  represent the synapses for the TC, RE and CX layers,  
793 respectively. The number inside the circle represents the connectivity percentage.

794

## 795 **Supplementary Video Legend**

796

797 **Video S1:** Closed-loop spontaneous oscillations of the three-layer thalamocortical system with 60×60  
798 neurons in each layer (99% intracortical connectivity, 99% excitatory neurons, 10% Cortex-Thalamus  
799 connections). Wave directions are indicated by the vector field using the optical flow method in MATLAB.

800

801 **Video S2:** Closed-loop spontaneous oscillations of the three-layer thalamocortical system with 60×60  
802 neurons in each layer (99% intracortical connectivity, 80% excitatory neurons, 10% Cortex-Thalamus  
803 connections).

804

805 **Video S3:** Closed-loop spontaneous oscillations of the three-layer thalamocortical system with 60×60  
806 neurons in each layer (99% intracortical connectivity, 80% excitatory neurons, 90% Cortex-Thalamus  
807 connections).

808

809 **Video S4:** Closed loop oscillations with two highly connected clusters in the cortex (80% excitatory  
810 neurons, 10% Cortex-Thalamus connections).

811

812 **Video S5:** Reduced model CX-RE. Dynamics with 90% CX-RE connections and a delay of 2 ms.

813

814 **Video S6:** Reduced model CX-RE. Dynamics with 90% CX-RE connections and a delay of 4 ms.

815

816 **Video S7:** Reduced model CX-RE. Dynamics with one unconnected point of CX-RE (24 ms), which  
817 creates a traveling wave in the diagonal direction. Delay of 4 ms.

818

819 **Video S8:** Reduced model CX-RE. Dynamics with a line of unconnected CX-RE points (24 ms), that  
820 creates oscillating planar waves. The initial threshold block is to create a unidirectional planar wave ( $t < 24$   
821 ms). Delay of 4 ms.

822

823 **Video S9:** Reduced model CX-RE. Dynamics with a line of unconnected CX-RE points (24 ms), that  
824 creates oscillating planar waves that are sustained infinitely. Delay is increased from 4 ms to 6 ms at  $t = 40$   
825 ms.

826

827 **Video S10:** Reduced model CX-RE. Dynamics with two lines of unconnected CX-RE points (24 ms), which  
828 are used to break the planar wave. The wave starts to rotate before being subdued by RE inhibition. Delay  
829 of 4 ms.

830

831 **Video S11:** Reduced model CX-RE. Dynamics with two lines of unconnected CX-RE points (24 ms), which  
832 are used to break the planar wave. The wave starts to rotate and ultimately evolves into two rotating  
833 spirals as the RE inhibition is reduced after  $t = 48$  ms. Delay of 4 ms.

834

835 **Video S12:** Closed-loop spontaneous oscillations of the three-layer thalamocortical system with  $60 \times 60$   
836 neurons in each layer (99% intracortical connectivity, 99% excitatory neurons, 10% Cortex-Thalamus  
837 connections), with RE inhibition increased.

838

839 **Video S13:** Closed-loop spontaneous oscillations of the three-layer thalamocortical system with  $60 \times 60$   
840 neurons in each layer (99% intracortical connectivity, 80% excitatory neurons, 10% Cortex-Thalamus  
841 connections), with intracortical excitatory weights increased.

842

843



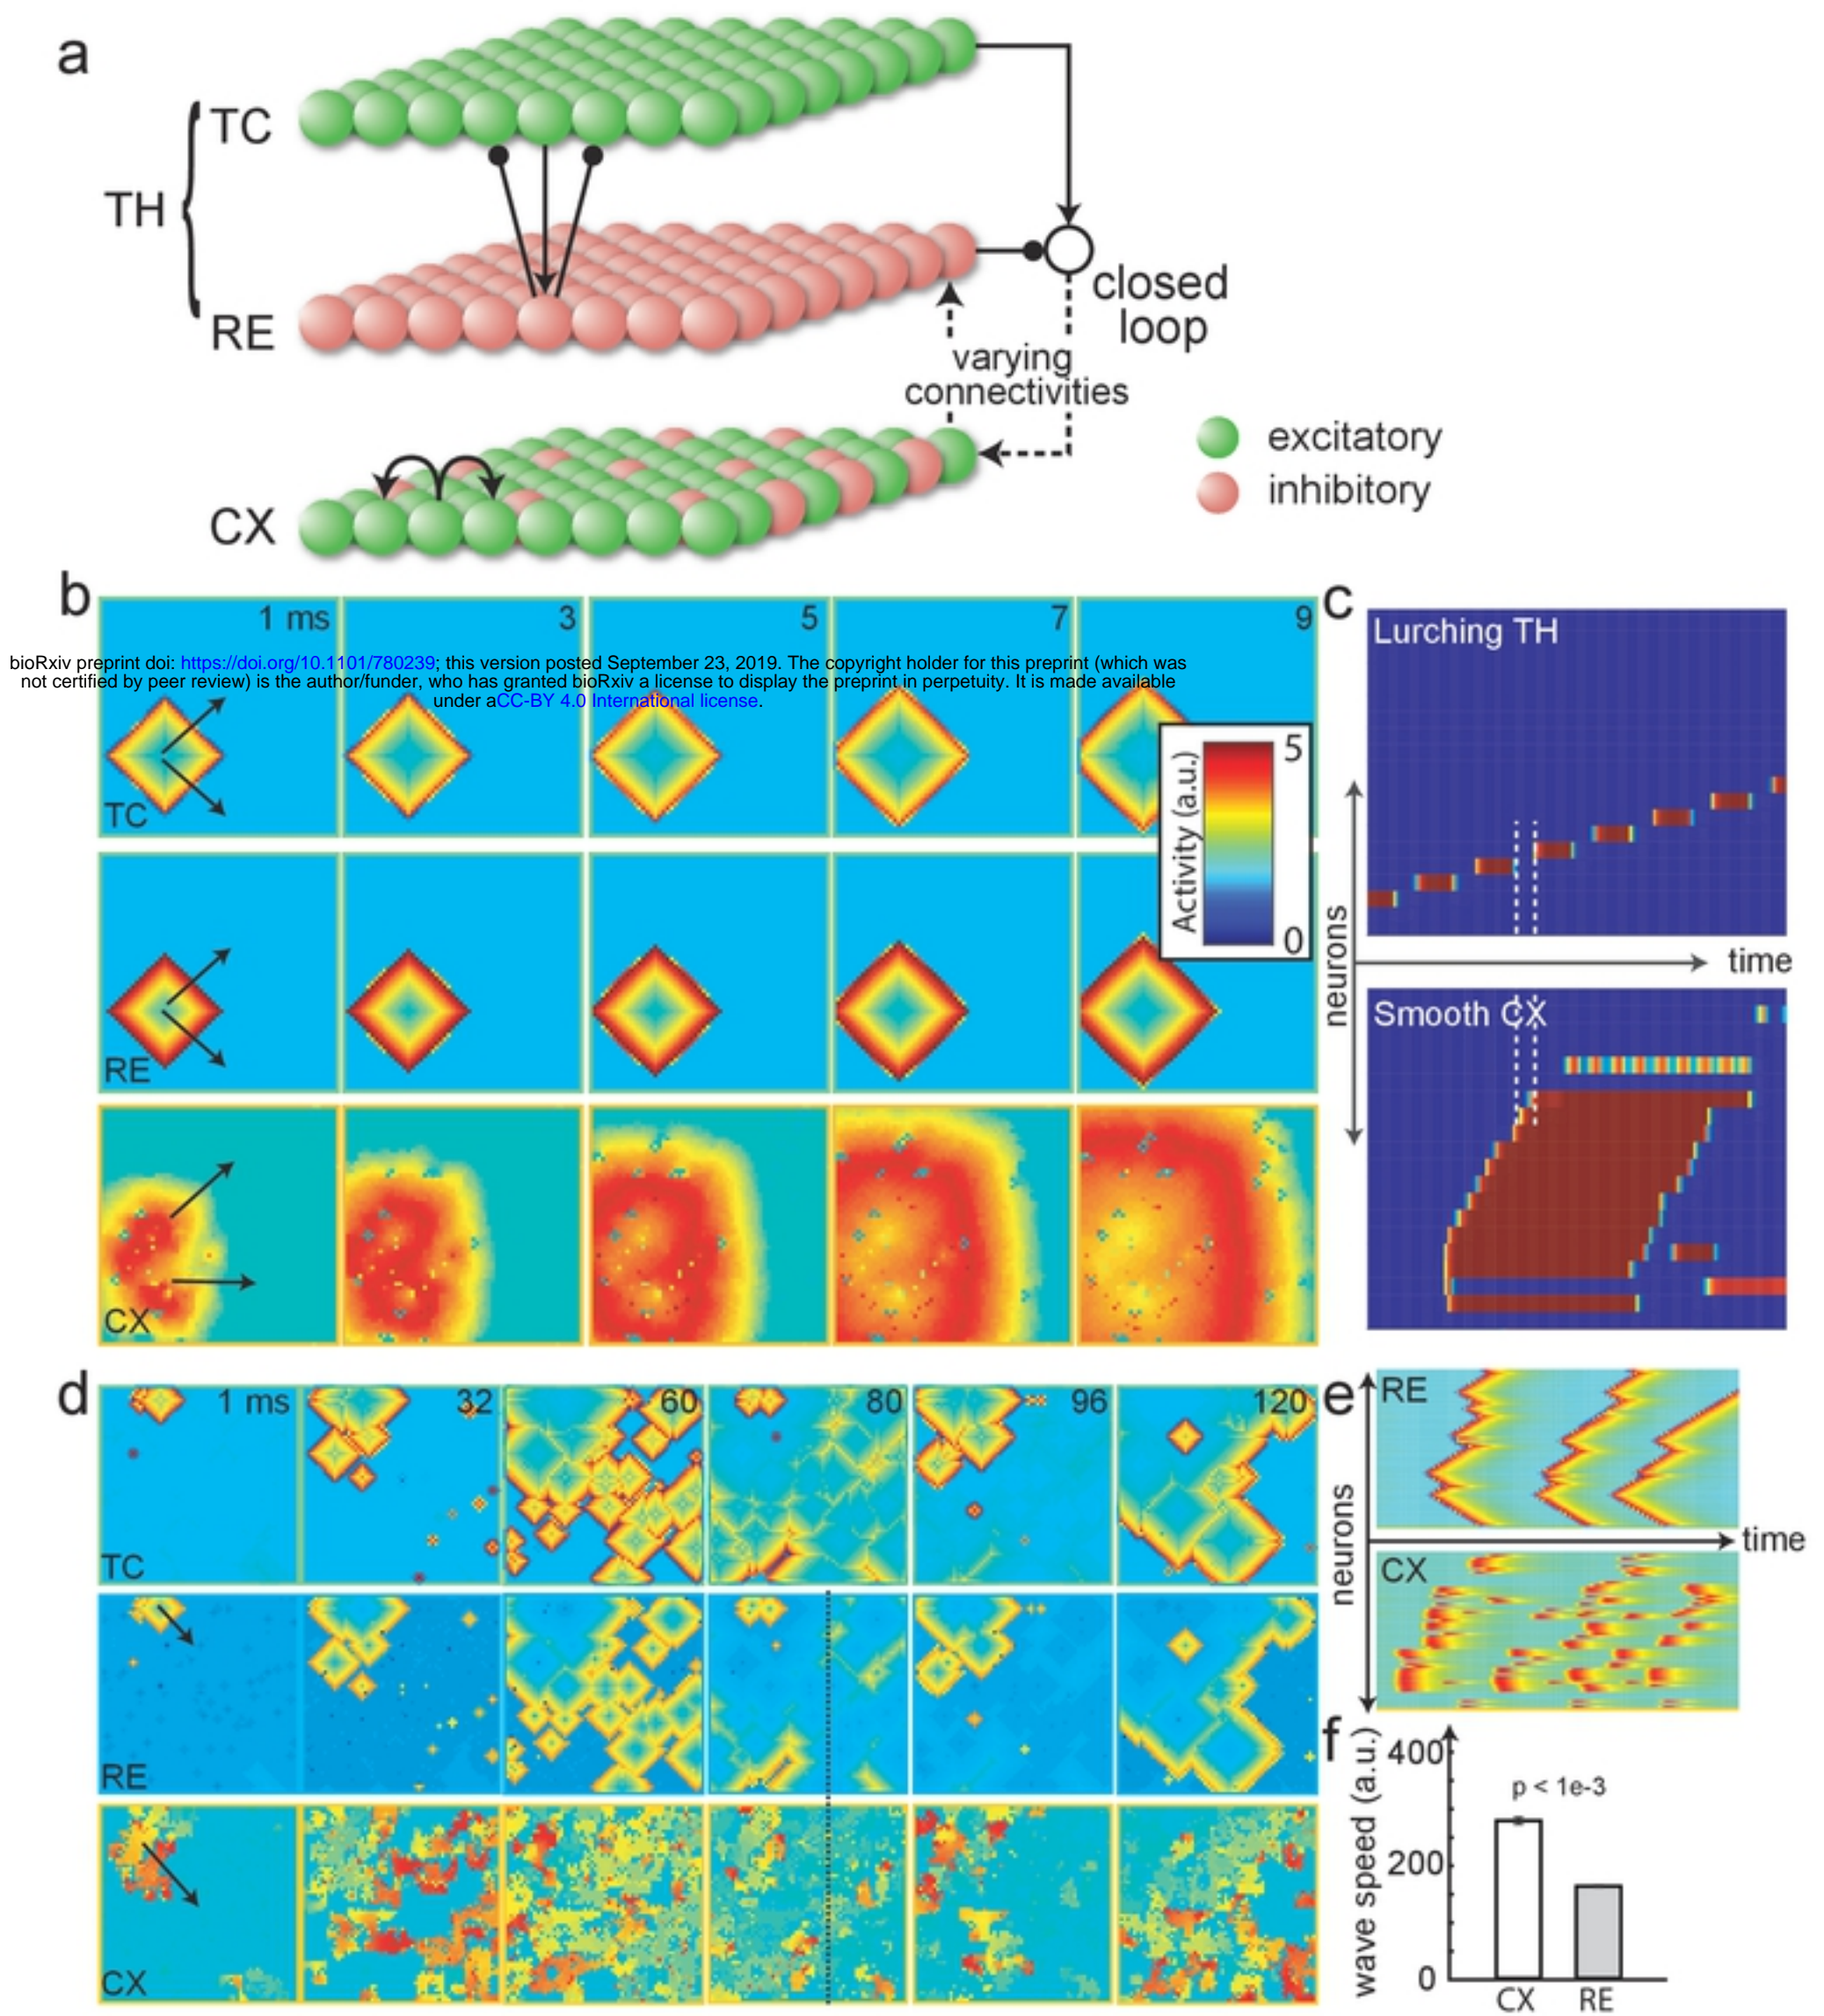

Figure



bioRxiv preprint doi: <https://doi.org/10.1101/780239>; this version posted September 23, 2019. The copyright holder for this preprint (which was not certified by peer review) is the author/funder, who has granted bioRxiv a license to display the preprint in perpetuity. It is made available under aCC-BY 4.0 International license.

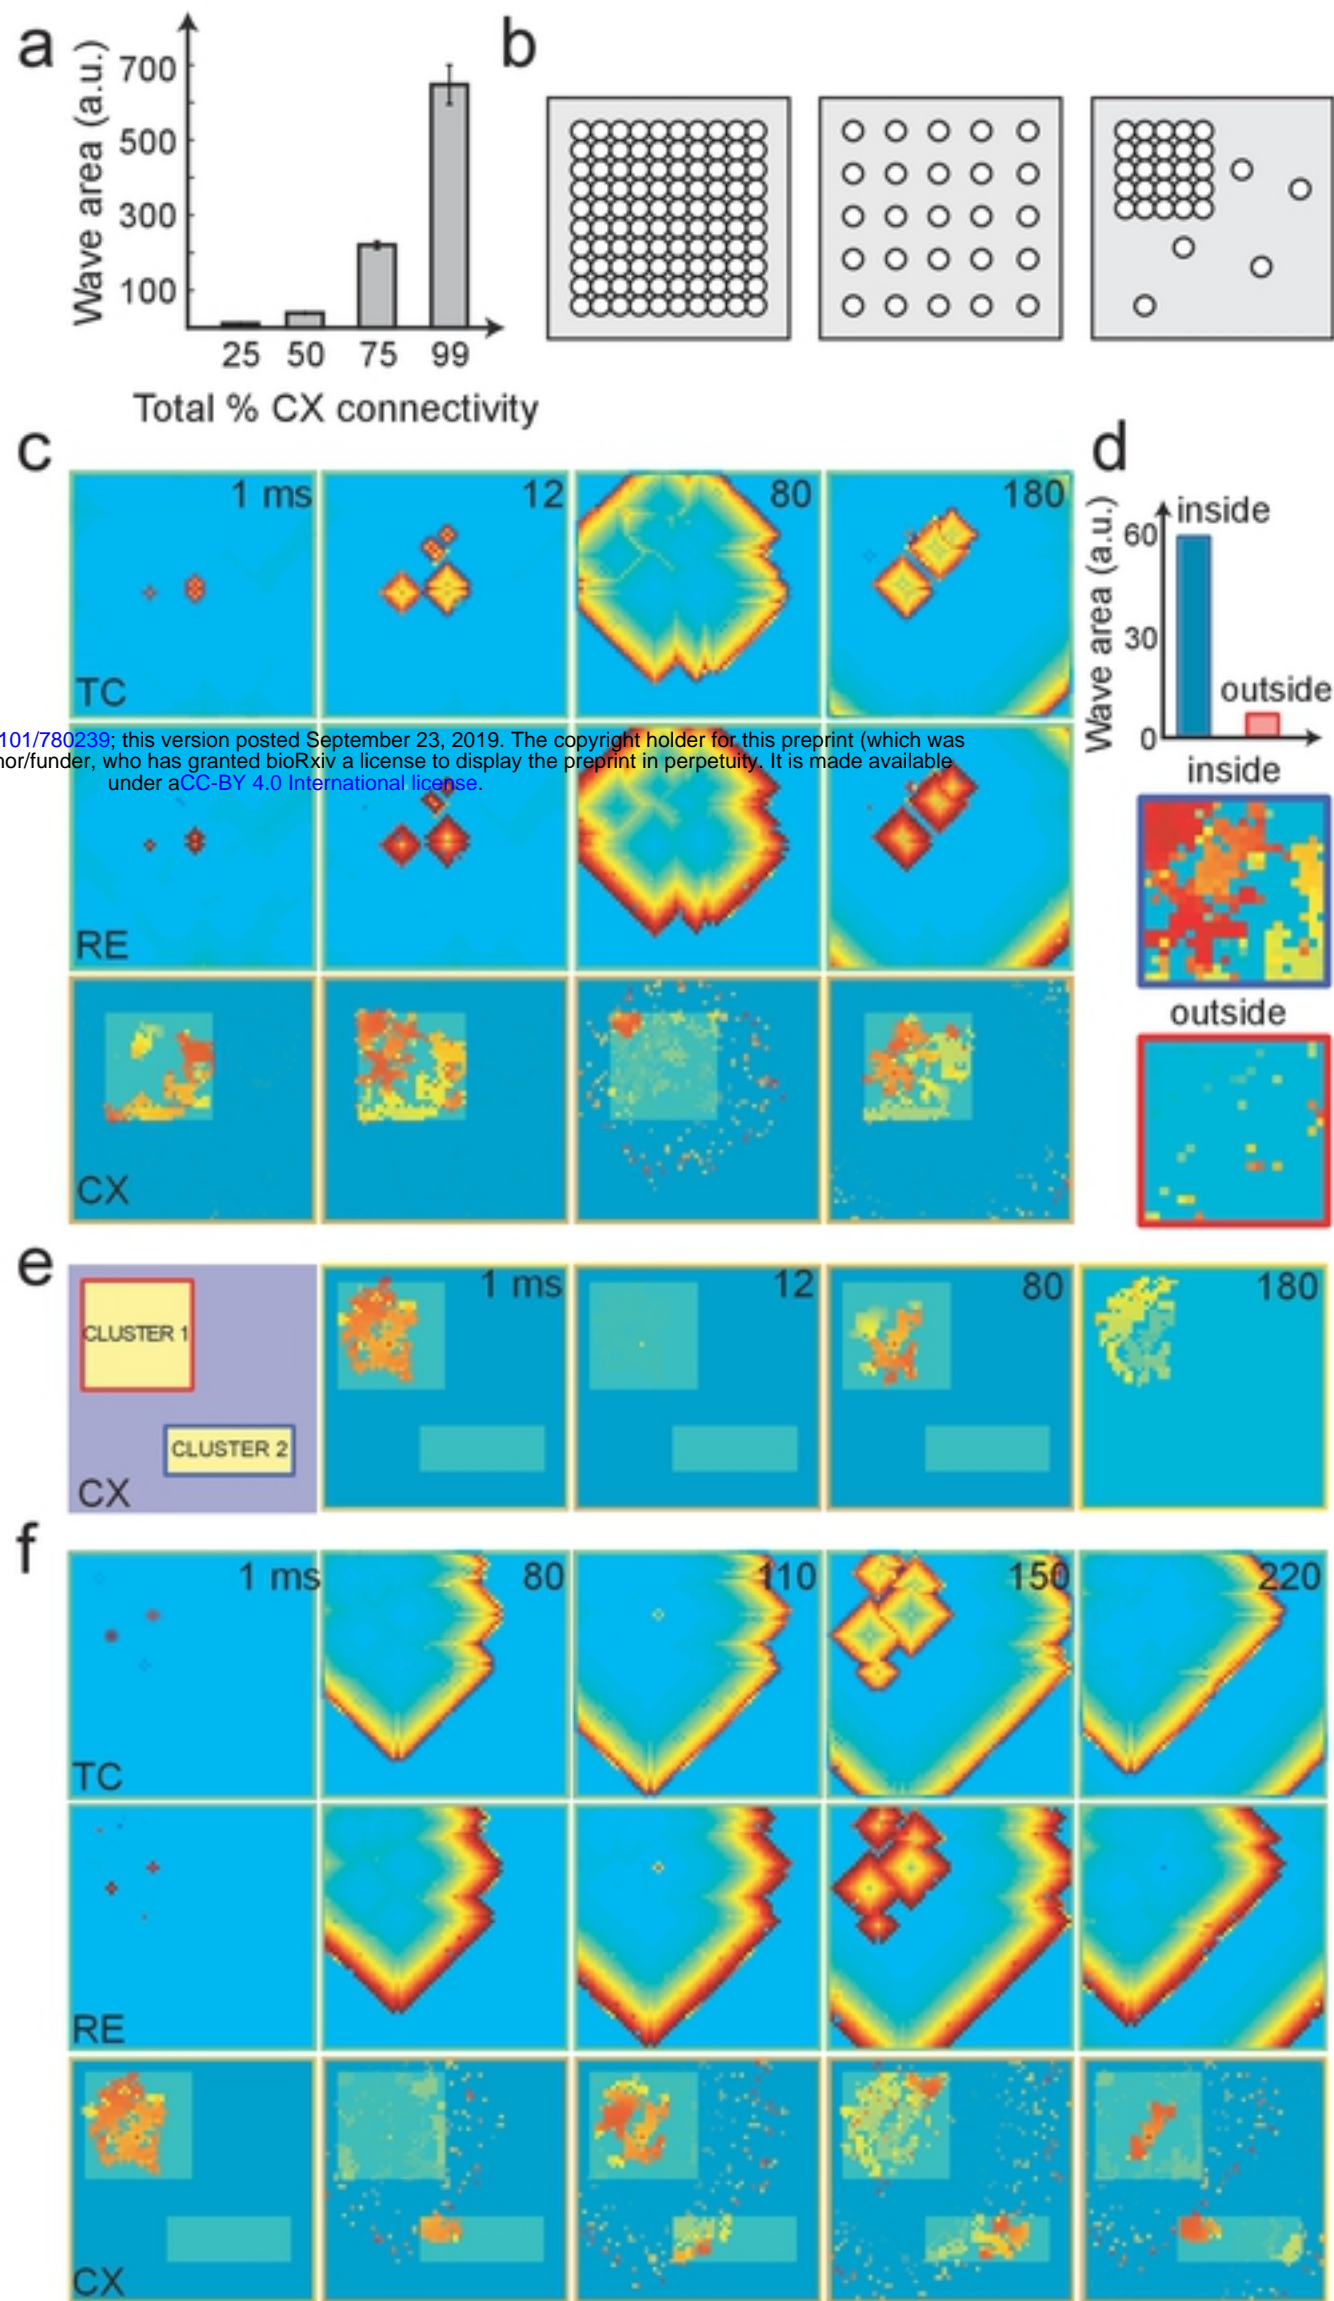

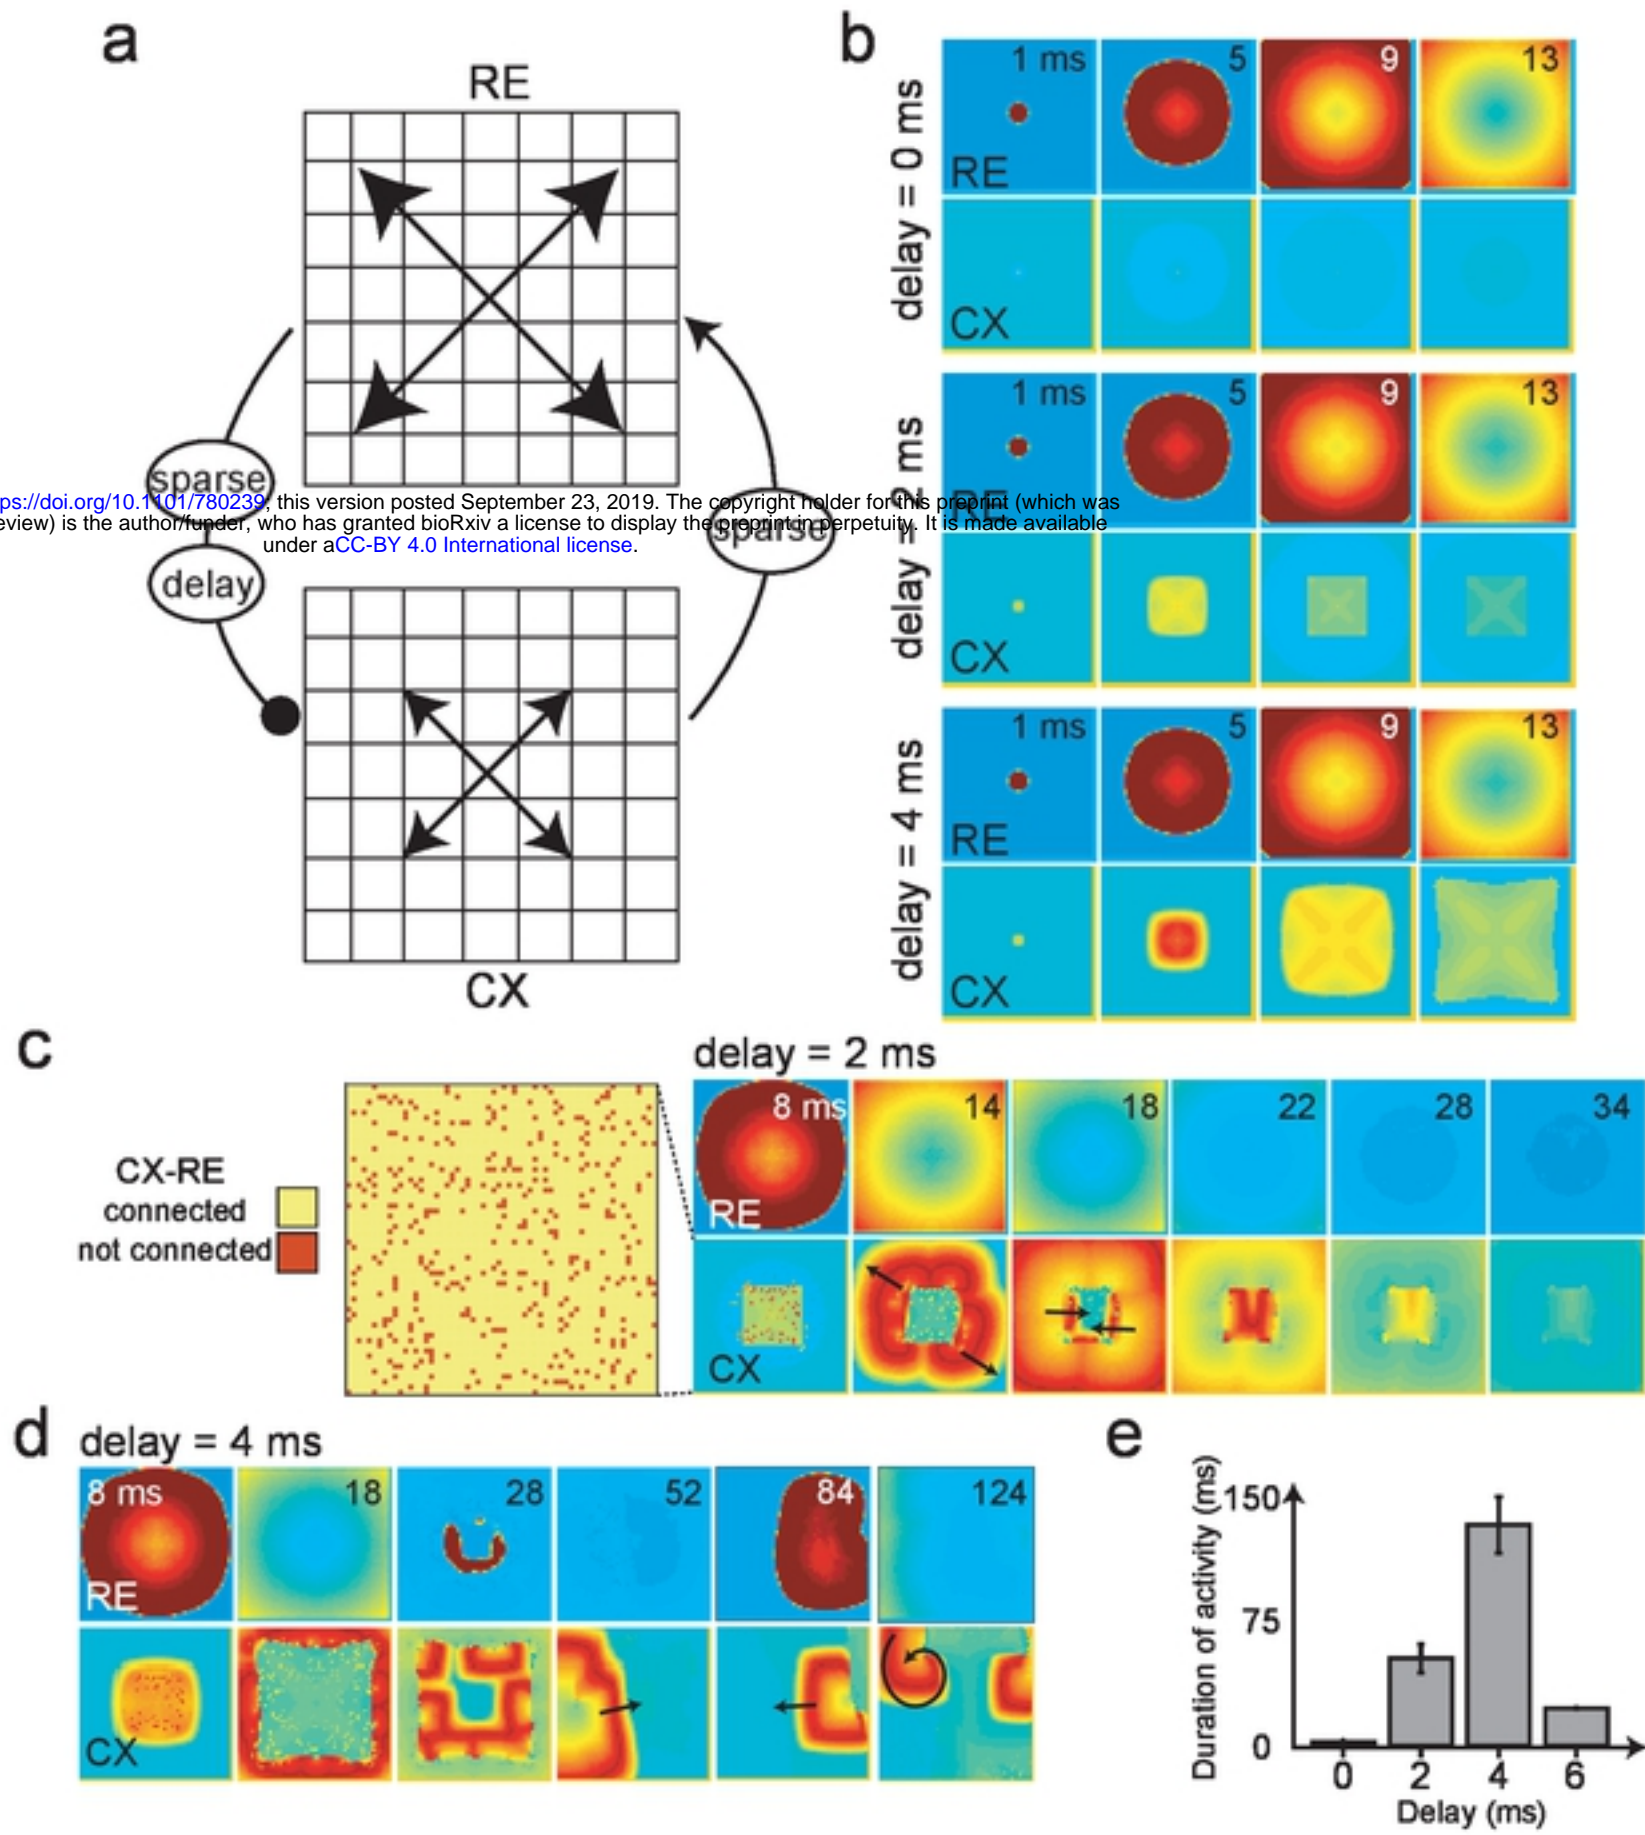



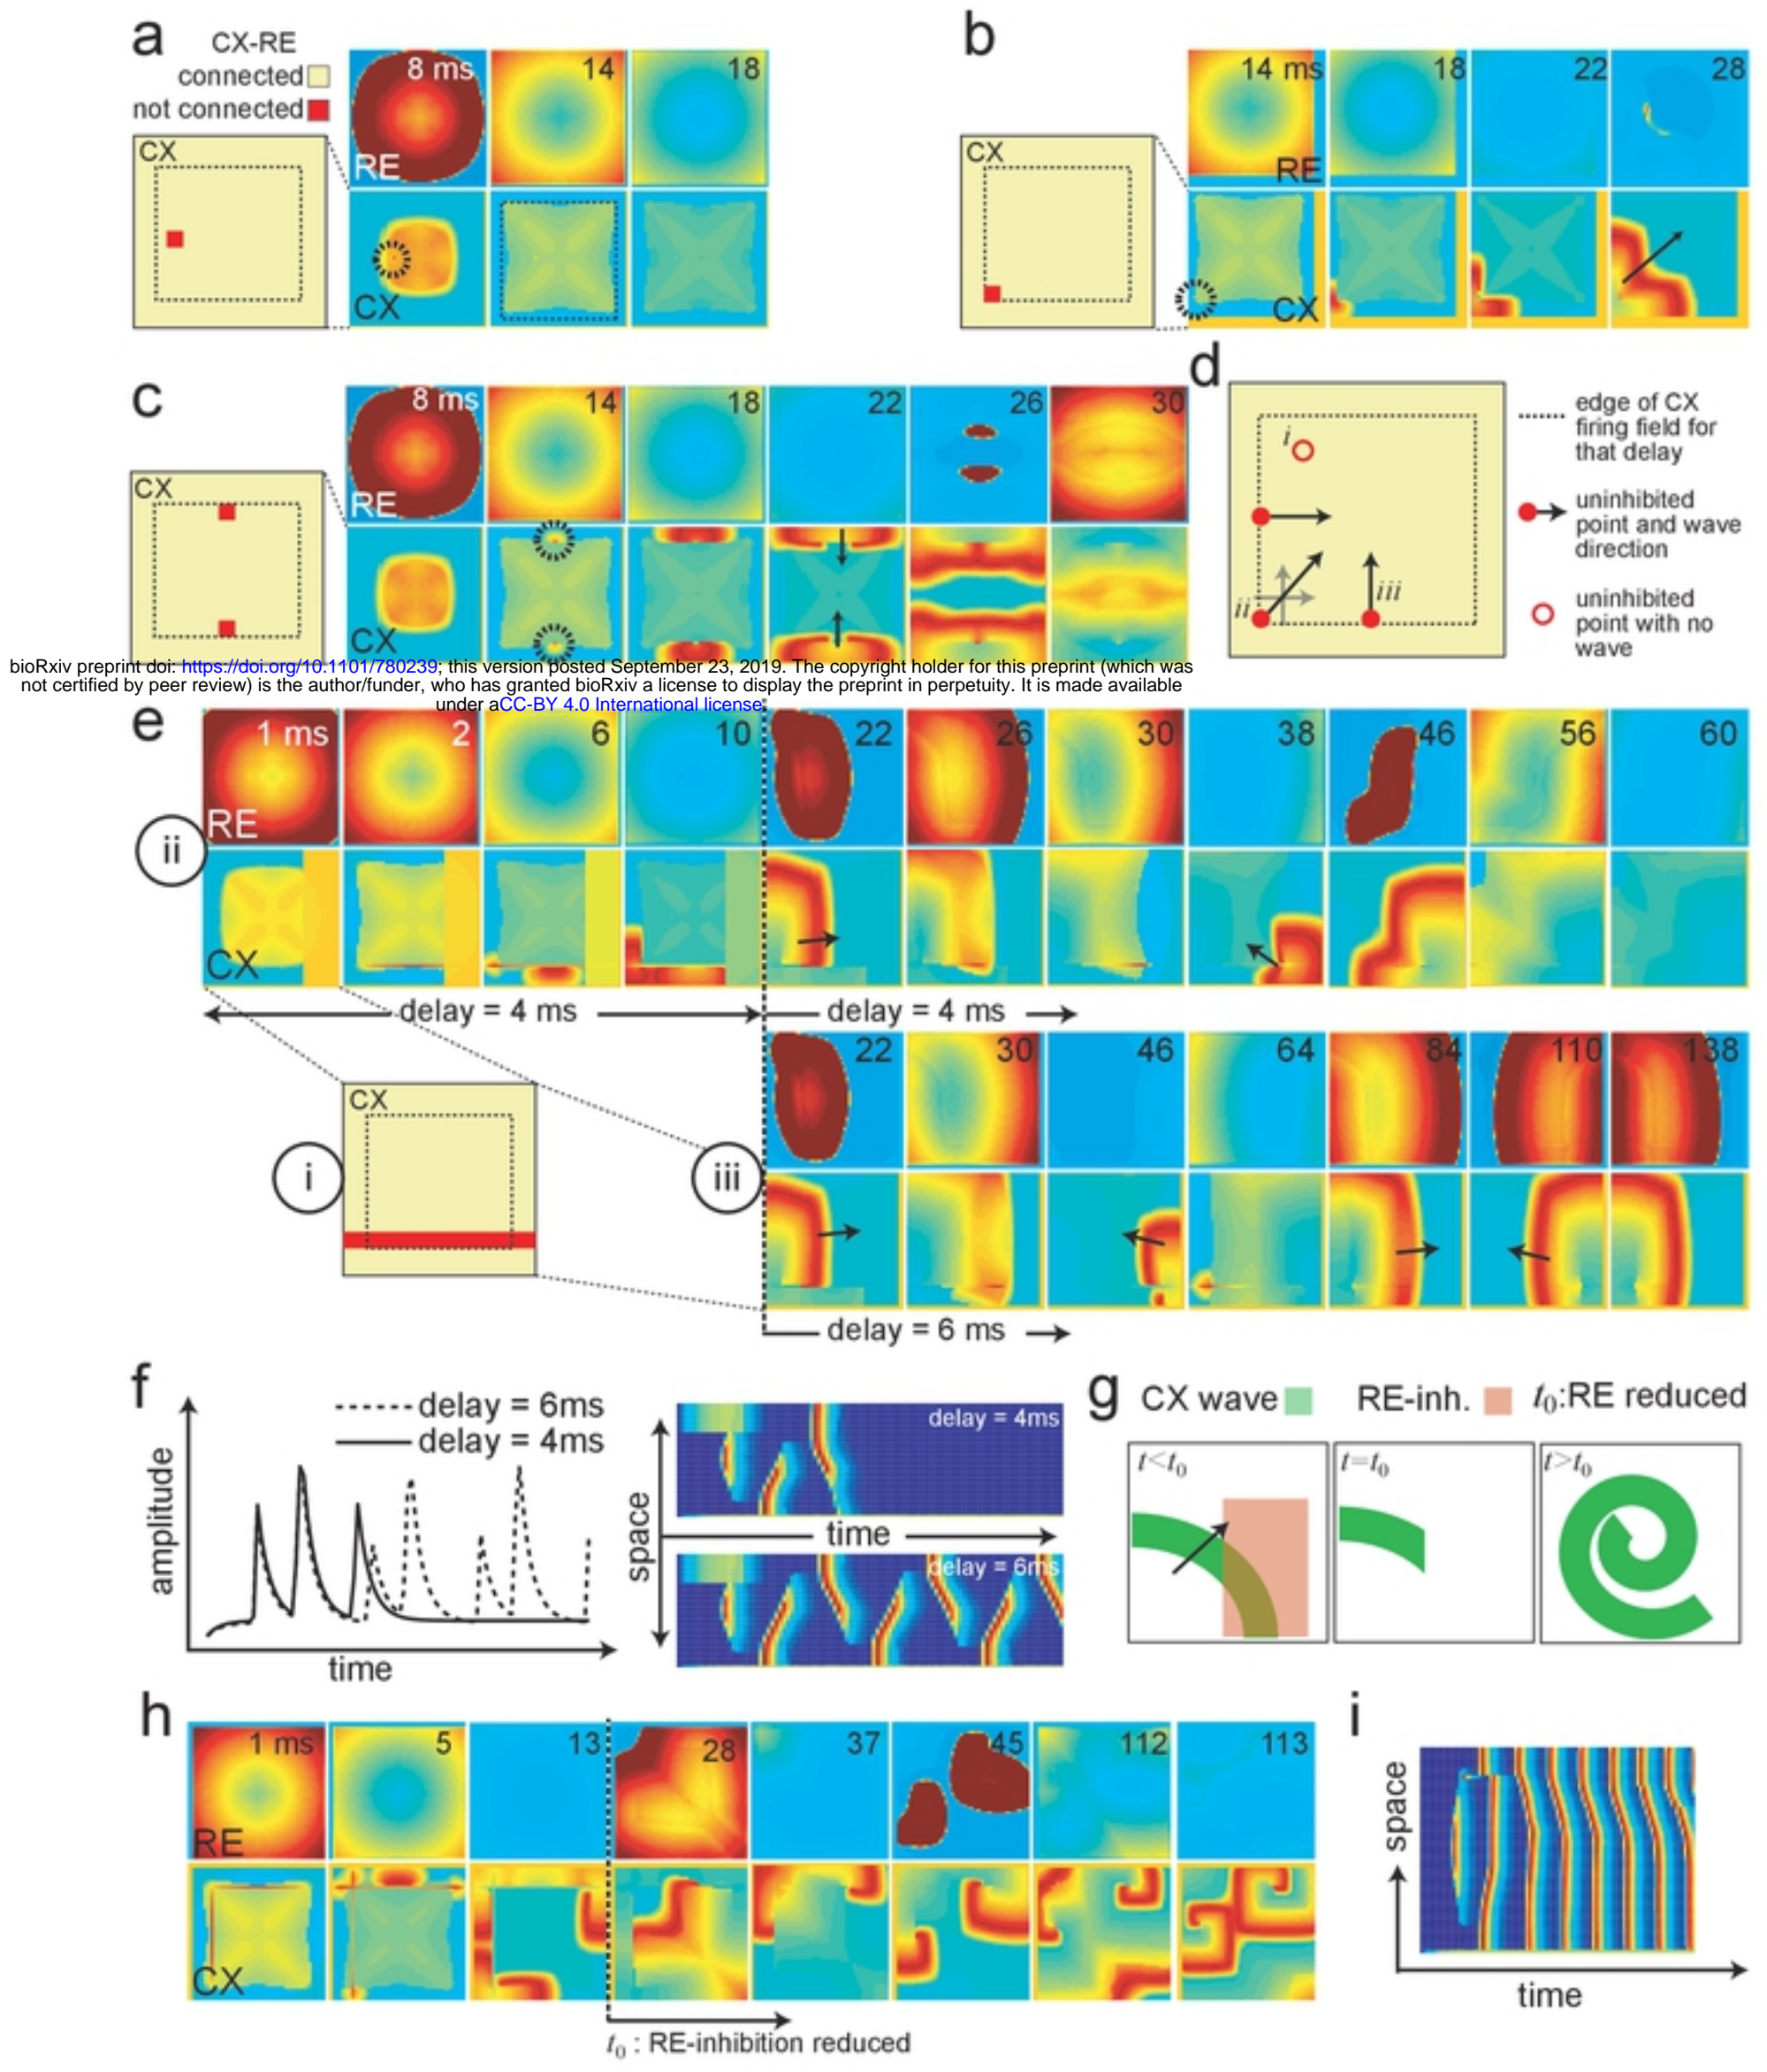

bioRxiv preprint doi: <https://doi.org/10.1101/780239>; this version posted September 23, 2019. The copyright holder for this preprint (which was not certified by peer review) is the author/funder, who has granted bioRxiv a license to display the preprint in perpetuity. It is made available under aCC-BY 4.0 International license.

Figure



bioRxiv preprint doi: <https://doi.org/10.1101/780239>; this version posted September 23, 2019. The copyright holder for this preprint (which was not certified by peer review) is the author/funder, who has granted bioRxiv a license to display the preprint in perpetuity. It is made available under aCC-BY 4.0 International license.

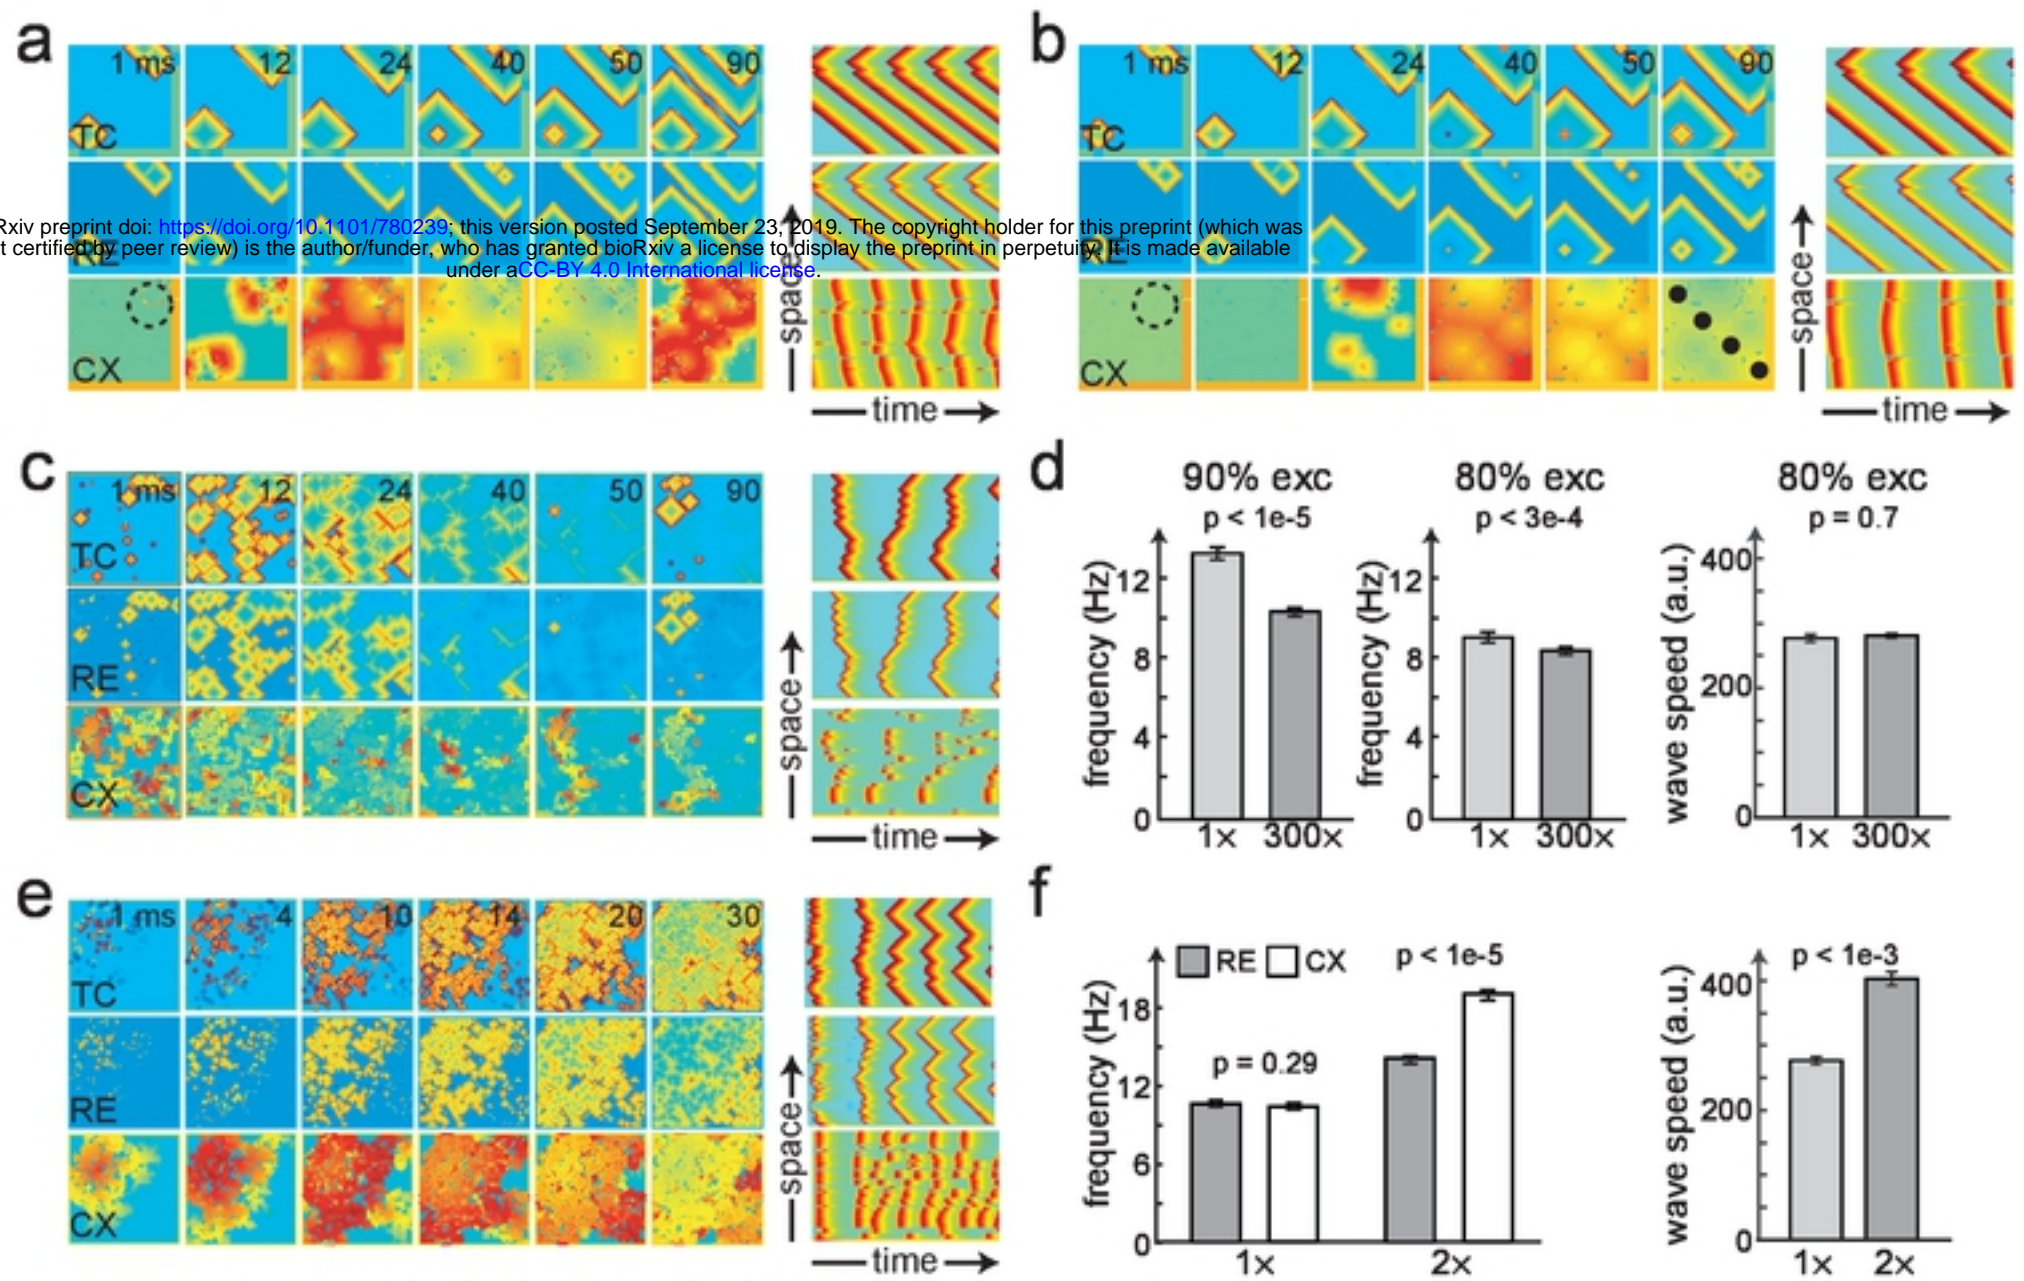



bioRxiv preprint doi: <https://doi.org/10.1101/780239>; this version posted September 23, 2019. The copyright holder for this preprint (which was not certified by peer review) is the author/funder, who has granted bioRxiv a license to display the preprint in perpetuity. It is made available under aCC-BY 4.0 International license.

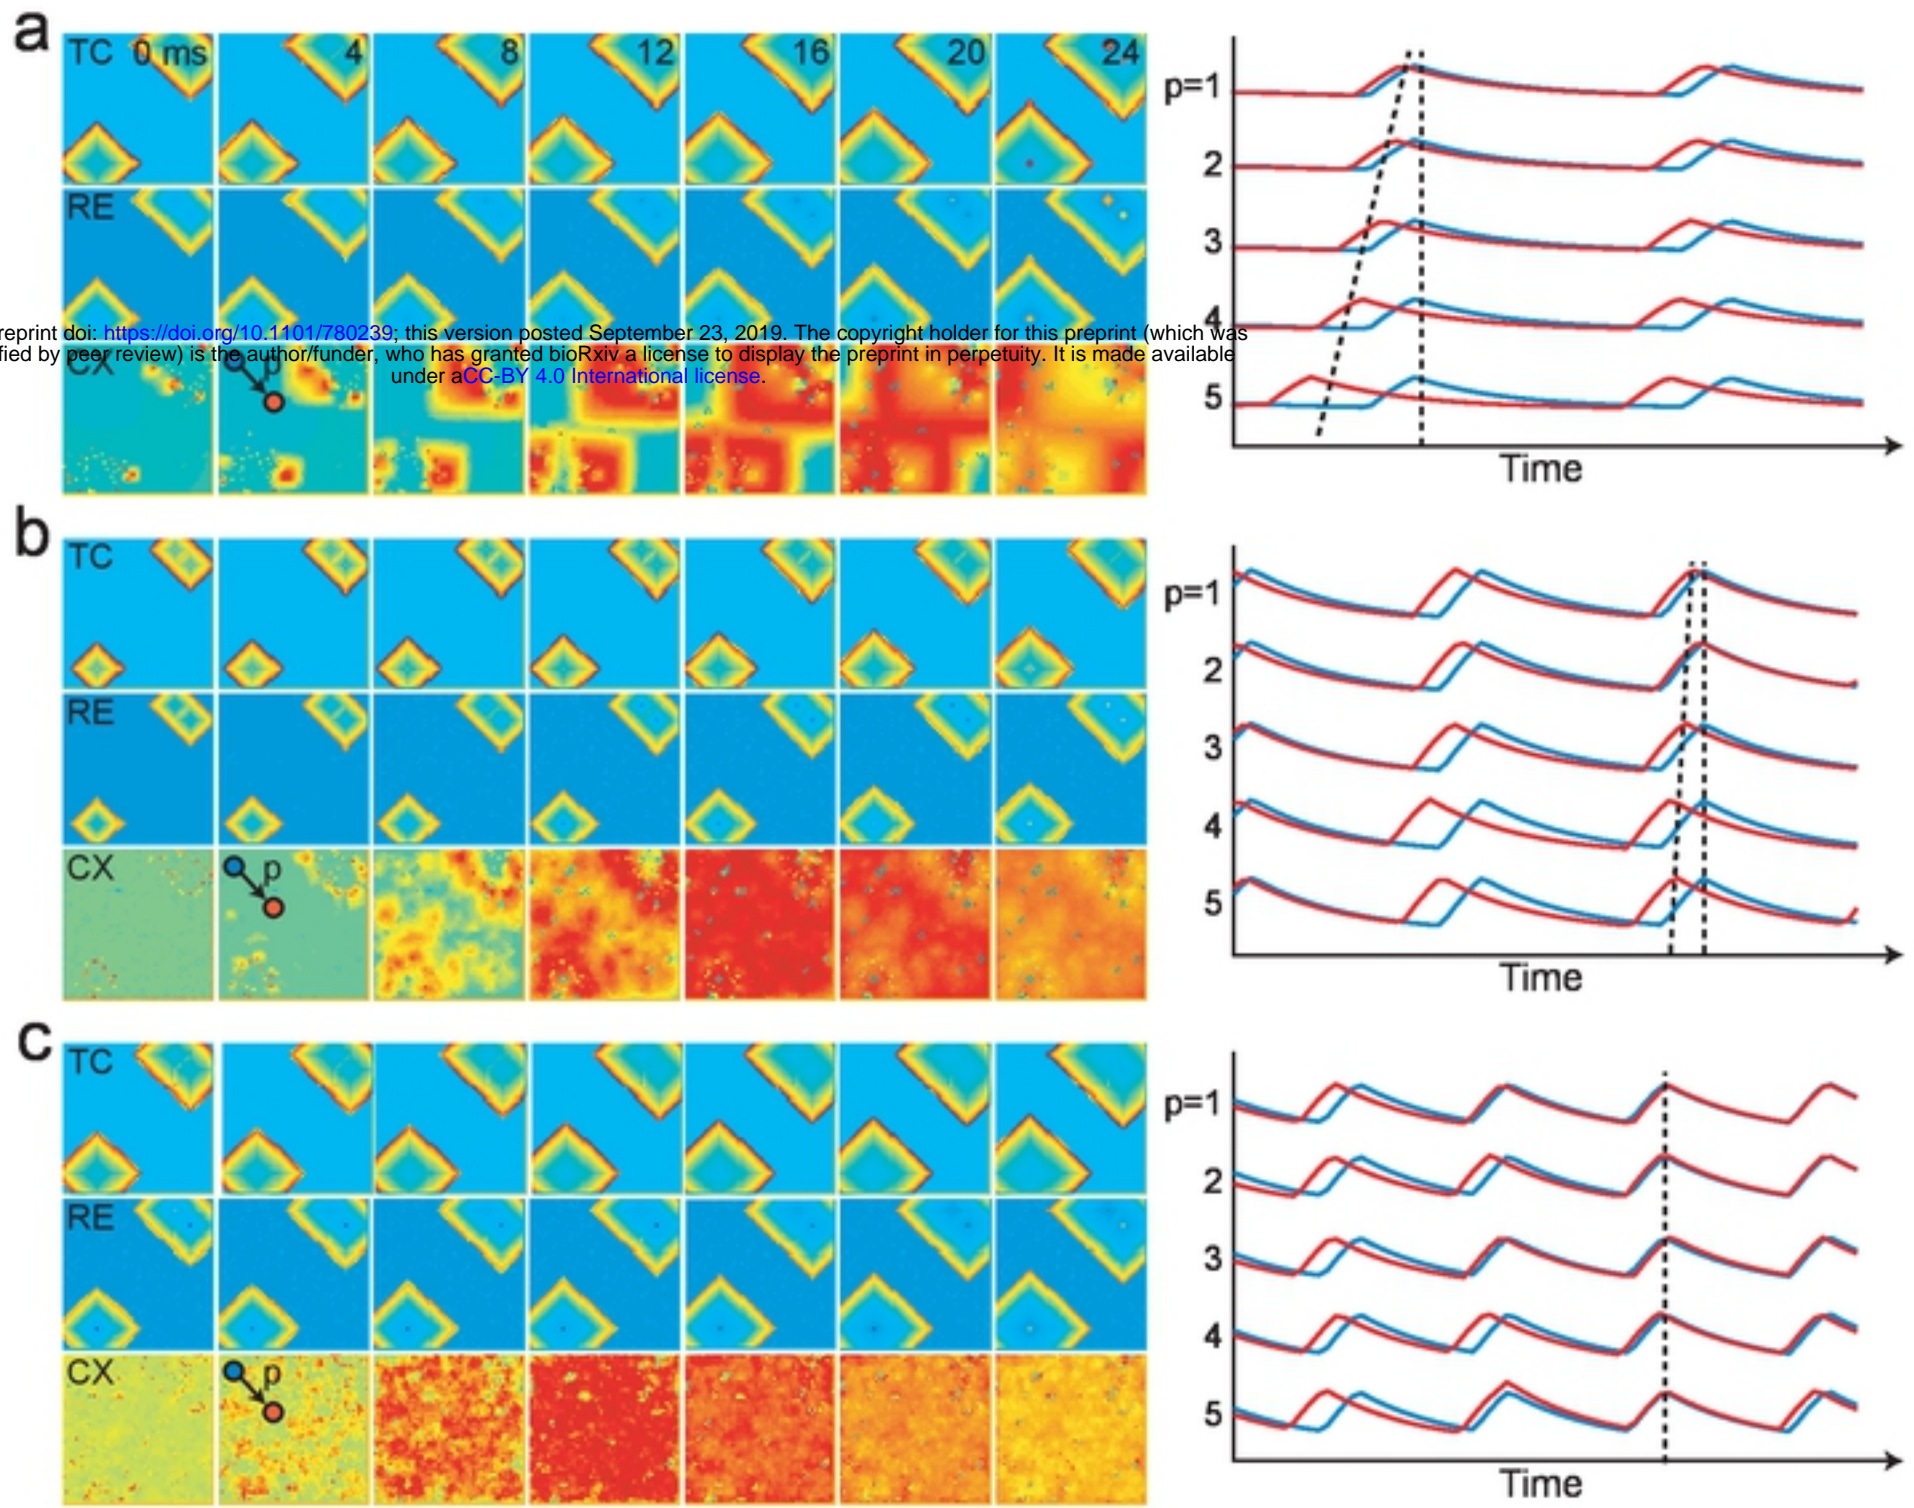

Source: http://biorxiv.org/content/10.1101/780239v1.full.pdf
